# Supplementary material
Source: Royal Society of Chemistry journal article supplement (doi:10.1039/d6en00254d)
Supplement: d6en00254d1.pdf [file d6en00254d1.pdf]

## Supporting Information

### Nano-fused Multidirectional Rotatable Floating Biocarrier: an Innovative Approach for the Removal of Petroleum Oil Spills

Karuvelan Murugan <sup>a</sup>, Udayadasan Sathiskumar <sup>a</sup>, Shankar Kunalan <sup>a</sup>, Mahadevan Harsha <sup>a</sup>, Govindasamy Hariharan <sup>a,\*</sup>, R. S. Robin <sup>a</sup>, K. Murugesan <sup>b</sup> and Ramachandran Purvaja <sup>a</sup>

<sup>a</sup> National Centre for Sustainable Coastal Management, Ministry of Environment, Forest and Climate Change (NCSCM, MoEF & CC), Chennai 600 025, India

<sup>b</sup> Odisha State Climate Change Cell, Forest, Environment and Climate Change Department, Government of Odisha, Bhubaneswar, Odisha 751001, India.

| S. No. | Content                                                                                                                                    | Page No |
|--------|--------------------------------------------------------------------------------------------------------------------------------------------|---------|
| SI-01  | GC-MS chromatogram of the aqueous leaf extract of <i>R. apiculata</i> mangrove.                                                            | 3       |
| SI-02  | Drop-collapse assay demonstrating biosurfactant activity by <i>A. baumannii</i> .                                                          | 4       |
| SI-03  | FT-IR spectrum of Ag <sub>2</sub> O nanoparticles green-synthesized using <i>R. apiculata</i> mangrove leaf extract.                       | 4       |
| SI-04  | Energy-dispersive X-ray spectrum of Ag <sub>2</sub> O nanocubes.                                                                           | 5       |
| SI-05  | Dynamic light scattering analysis for particle size distribution of Ag <sub>2</sub> O nanocubes.                                           | 5       |
| SI-06  | Surface charge distribution analysis of silver oxide nanocubes synthesized by dynamic light scattering.                                    | 6       |
| SI-07  | Photo-stability of m-NBR platform of Ag <sub>2</sub> O nanocubes under prolonged daylight illumination and suppression of photo-corrosion. | 6       |
| SI-08  | Re-usability and catalytic performance of the m-NBR platform for HCs degradation.                                                          | 7       |
| SI-09  | Time-dependent silver ion leaching from the m-NBR platform.                                                                                | 7       |
| SI-10  | GC-MS quantification of HCs degradation from petroleum oil by <i>A. baumannii</i> from second day to tenth day.                            | 8       |
| SI-11  | GC-MS quantification of HCs degradation from petroleum oil by m-NBR platform from second day to sixth day                                  | 15      |

|       |                                                                                                                                                                     |    |
|-------|---------------------------------------------------------------------------------------------------------------------------------------------------------------------|----|
| SI-12 | GC-MS quantification of HCs degradation catalytic performance cycles by m-NBR platform.                                                                             | 20 |
| SI-13 | Density functional theory quantum chemical calculations for oxides of silver species ( $\text{AgO}^\cdot$ , $\text{Ag}_2\text{O}$ and $\text{Ag}_4\text{O}^{2+}$ ). | 24 |
| SI-14 | List of Electronic Energies of HCs including n-alkanes, iso-alkanes, cycloalkanes, poly aromatic hydrocarbons and secondary metabolites from GC-MS studies.         | 26 |

---

**SI-1.** GC-MS chromatogram of the aqueous leaf extract of *R. apiculata* mangrove.

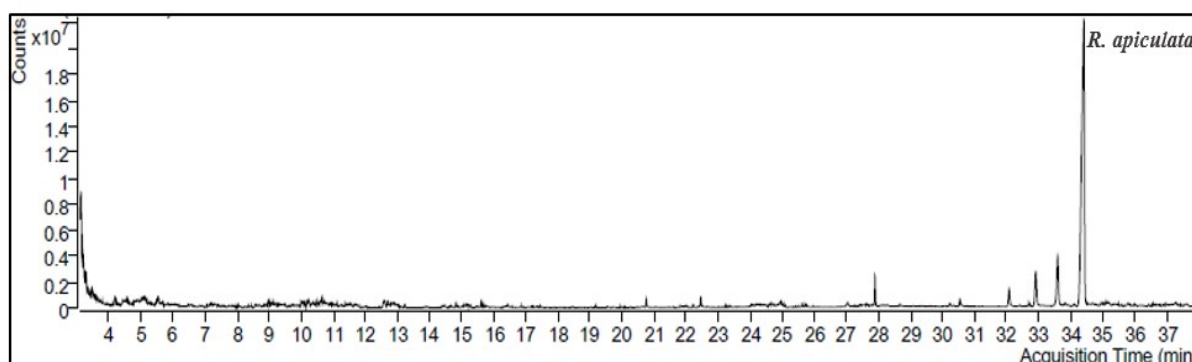

**Table S-1** List of phytochemicals present in aqueous leaf extract of *R. apiculata* as predicted by GC-MS analysis.

| S. No. | Name of the Phytochemicals                                  | RT     | Peak Area% | Molecular Formula                                              |
|--------|-------------------------------------------------------------|--------|------------|----------------------------------------------------------------|
| 1      | 1-Bromo-5-methoxypentane                                    | 9.625  | 0.63       | C <sub>6</sub> H <sub>13</sub> BrO                             |
| 2      | Silane, butoxytrimethyl-                                    | 10.226 | 0.04       | C <sub>7</sub> H <sub>18</sub> OSi                             |
| 3      | 1-Hexanol                                                   | 10.467 | 0.06       | C <sub>6</sub> H <sub>14</sub> O                               |
| 4      | 1,3-Cyclohexadiene                                          | 10.603 | 1.18       | C <sub>10</sub> H <sub>16</sub>                                |
| 5      | 1,3-Diisopropoxy-1,3-dimethyl-1,3-disiletane                | 11.320 | 1.82       | C <sub>10</sub> H <sub>26</sub> O <sub>2</sub> Si <sub>2</sub> |
| 6      | Silane, (1,1-dimethyl-2-propene)                            | 13.617 | 1.29       | C <sub>5</sub> H <sub>12</sub> Si                              |
| 7      | Megastigmatrienone                                          | 15.827 | 1.14       | C <sub>13</sub> H <sub>18</sub> O                              |
| 9      | 2-Cyclohexen-1-one                                          | 16.599 | 1.79       | C <sub>6</sub> H <sub>8</sub> O                                |
| 10     | 6,7-Dehydro-7,8-dihydro-3-oxo-.alpha.-ionol                 | 17.344 | 1.08       | C <sub>13</sub> H <sub>20</sub> O <sub>2</sub>                 |
| 11     | 2(4H)-Benzofuranone                                         | 18.026 | 1.39       | C <sub>8</sub> H <sub>6</sub> O <sub>2</sub>                   |
| 12     | Pluchidiol                                                  | 18.220 | 6.44       | C <sub>15</sub> H <sub>22</sub> O <sub>2</sub>                 |
| 13     | 3,4,5-Trimethoxybenzyl alcohol                              | 18.608 | 8.00       | C <sub>10</sub> H <sub>14</sub> O <sub>4</sub>                 |
| 14     | Pyridine, 2,2'-(1,2-phenylene)                              | 18.550 | 11.71      | C <sub>16</sub> H <sub>12</sub> N <sub>2</sub>                 |
| 15     | Silane, dimethyl(2-pentyloxy)                               | 18.885 | 5.66       | C <sub>7</sub> H <sub>18</sub> OSi                             |
| 16     | 2,4-dichloro-6-pip-s-Triazine                               | 18.951 | 8.91       | C <sub>8</sub> H <sub>10</sub> Cl <sub>2</sub> N <sub>4</sub>  |
| 17     | 10-Undecenyl Hexofuranoside                                 | 19.018 | 7.08       | C <sub>17</sub> H <sub>32</sub> O <sub>6</sub>                 |
| 18     | Bis(2,3,4,5,6-Pentamethyl-4-piperidyl)                      | 19.043 | 10.44      | C <sub>18</sub> H <sub>36</sub> N <sub>2</sub>                 |
| 19     | 2-O-tert-Butyl-dimethyl-silyl-4,6-O-ethyl-idene-myo-insitol | 19.255 | 6.28       | C <sub>16</sub> H <sub>34</sub> O <sub>6</sub> Si              |
| 20     | Hexadecanoic acid                                           | 19.463 | 9.01       | C <sub>16</sub> H <sub>32</sub> O <sub>2</sub>                 |
| 21     | 9,12-Octadecadienoic acid/linoleic acid                     | 21.128 | 2.17       | C <sub>18</sub> H <sub>32</sub> O <sub>2</sub>                 |
| 22     | 9,12,15-Octadecatrienoic acid/linolenic acid                | 21.190 | 5.06       | C <sub>18</sub> H <sub>30</sub> O <sub>2</sub>                 |
| 23     | Phytol                                                      | 21.301 | 2.07       | C <sub>20</sub> H <sub>40</sub> O                              |
| 24     | Octadecanoic acid/stearic acid                              | 21.394 | 1.63       | C <sub>18</sub> H <sub>36</sub> O <sub>2</sub>                 |

---

**SI-2.** Drop-collapse assay demonstrating biosurfactant activity by *A. baumannii*.

---

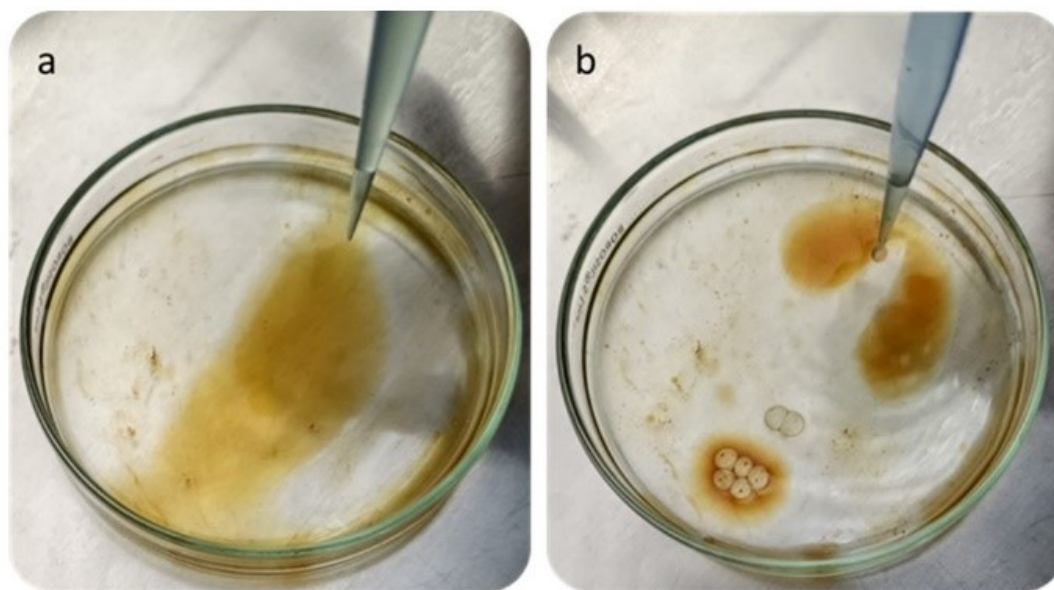

**Fig. SI-1** Images of the drop collapse assay (a) control and (b) drop collapse test.

---

**SI-3.** FT-IR spectrum of Ag<sub>2</sub>O nanoparticles green-synthesized using *R. apiculata* mangrove leaf extract.

---

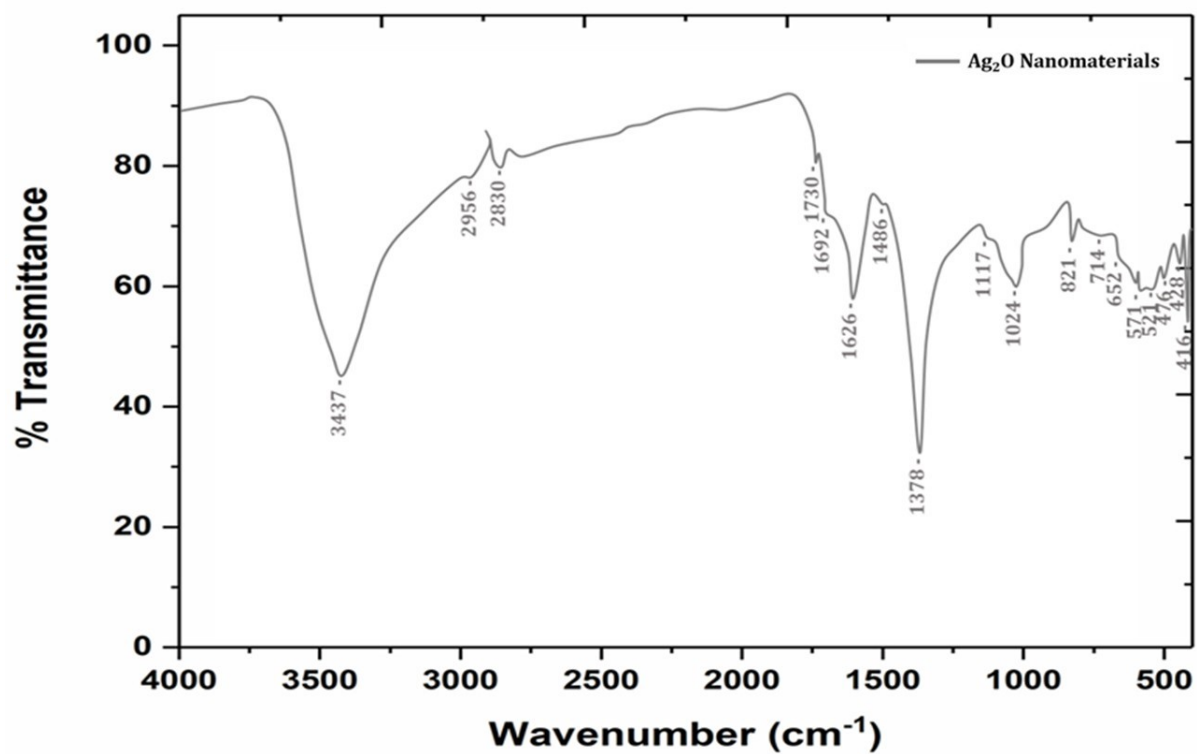

**Fig. SI-2** FT-IR spectrum of the green synthesized Ag<sub>2</sub>O nanomaterials using *R. apiculata* mangrove leaf extract.

---

**SI-4.** Energy-dispersive X-ray spectrum of Ag<sub>2</sub>O nanocubes.

---

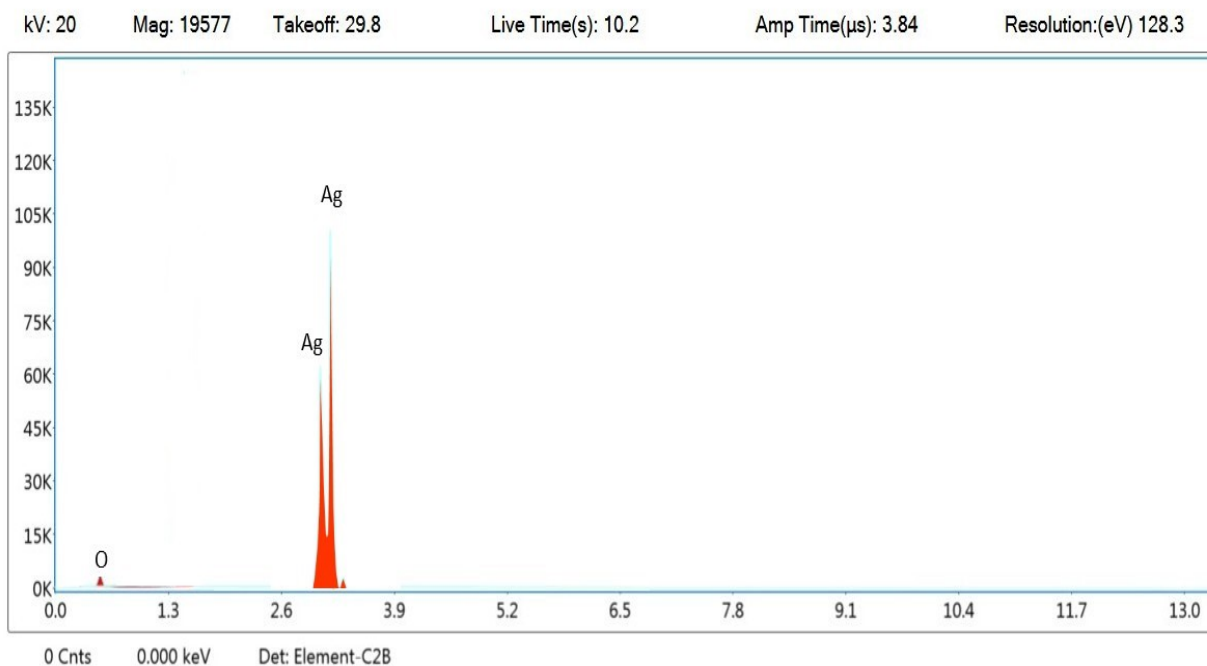

**Fig. SI-3** EDX spectrum of green synthesized Ag<sub>2</sub>O nanocubes.

---

**SI-5.** Dynamic light scattering analysis for particle size distribution of Ag<sub>2</sub>O nanocubes.

---

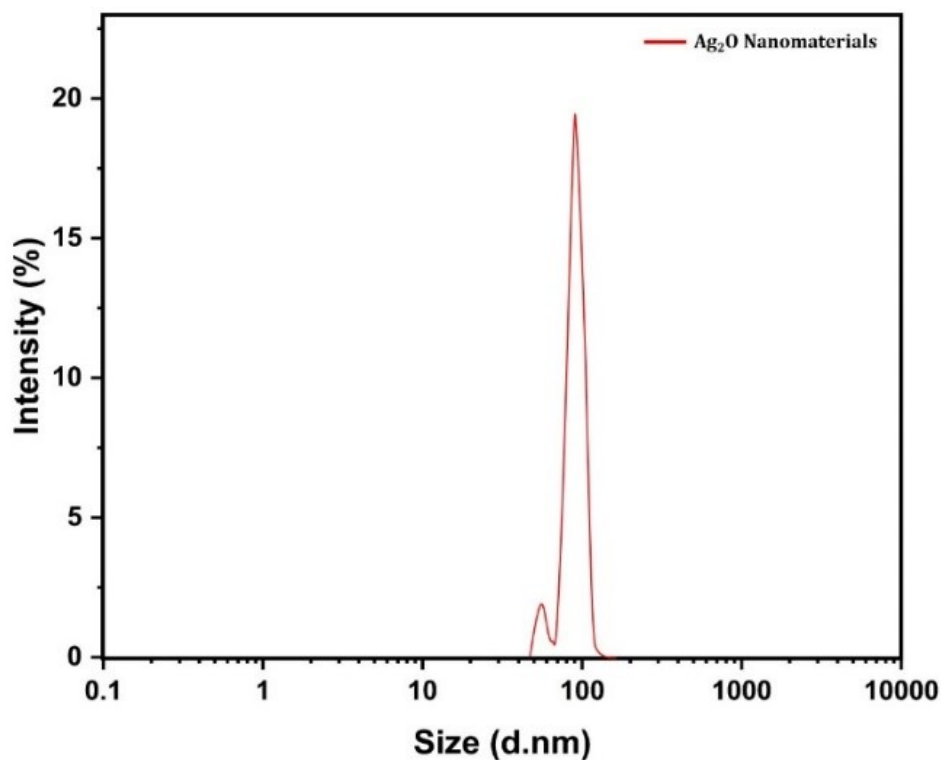

**Fig. SI-4** Surface size distribution analysis Ag<sub>2</sub>O nanocubes using *R. apiculata* mangrove leaf extract.

---

**SI-6.** Surface charge distribution analysis of silver oxide nanocubes synthesized by dynamic light scattering.

---

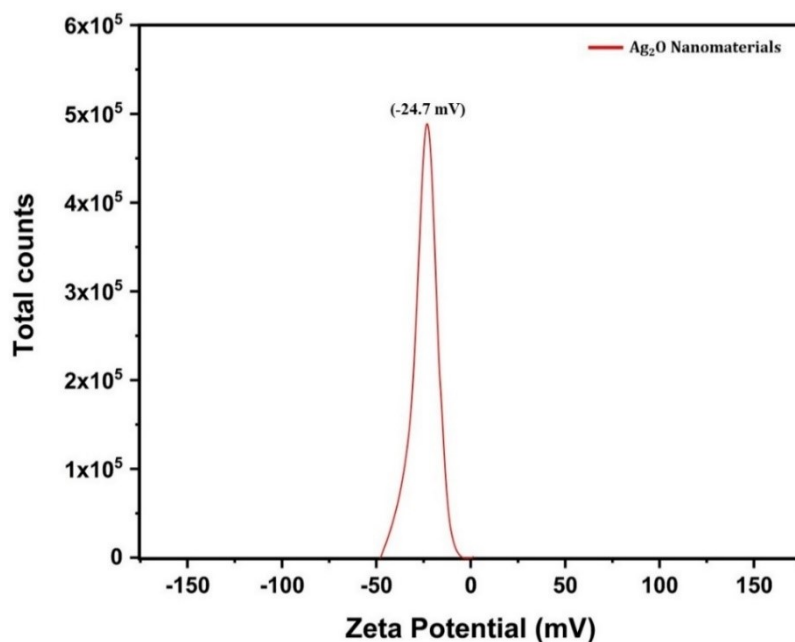

**Fig. SI-5** Surface charge distribution analysis silver oxide nanocubes using *R. apiculata* mangrove leaf extract.

---

**SI-7.** Photo-stability of m-NBR platform of Ag<sub>2</sub>O nanocubes under prolonged daylight illumination and suppression of photo-corrosion.

---

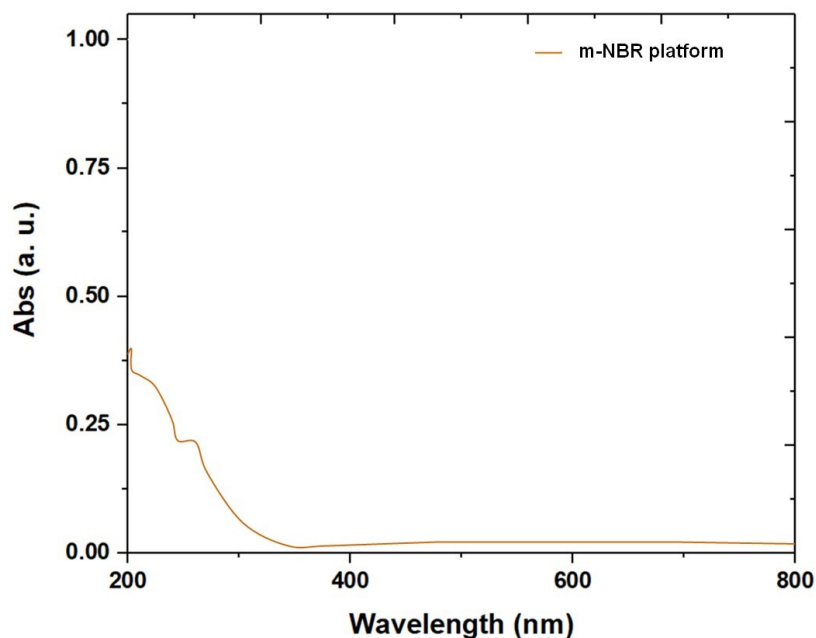

**Fig. SI-6** Photo-stability of m-NBR platform of Ag<sub>2</sub>O under prolonged day light illumination, demonstrating the no suppression of photo-corrosion in the m-NBR platform on fifth catalytic degradation cycle as evidenced by UV-Vis absorption spectrum.

---

**SI-8.** Re-usability and catalytic performance of the m-NBR platform for HCs degradation.

---

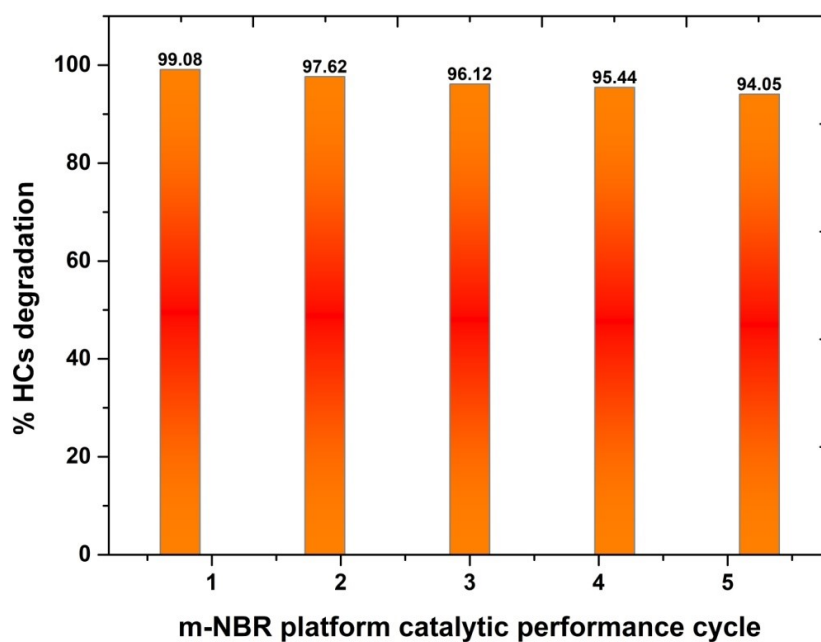

**Fig. SI-7** Reusability of the m-NBR platform for catalytic degradation of HCs, displays sustained degradation efficiency (> 94%) over five successive cycles.

---

**SI-9.** Time-dependent silver ion leaching from the m-NBR platform.

---

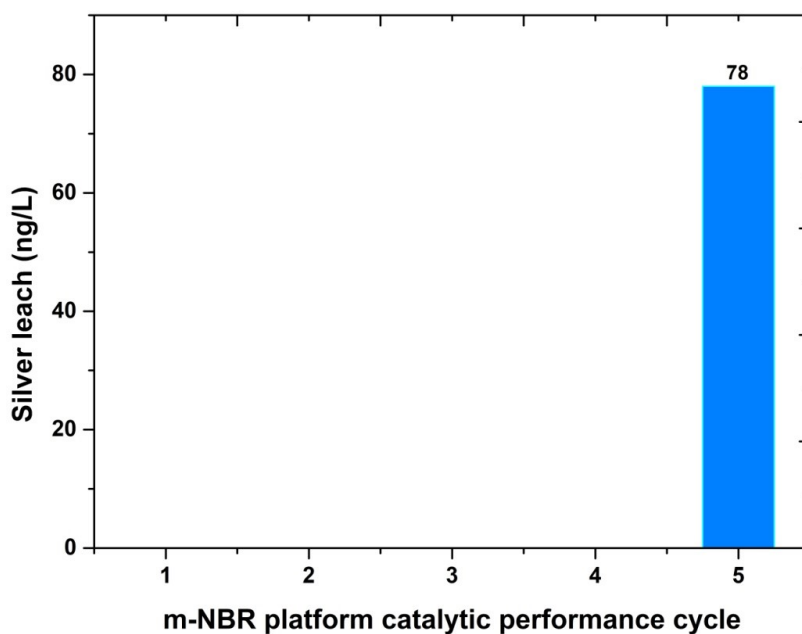

**Fig. SI-8** Time-dependent silver ion leaching from the m-NBR platform, demonstrating for catalytic degradation of HCs, displays sustained degradation efficiency (> 94%) over five successive cycles. Low metal release (ng/L) and good stability at fifth cycle.

**SI-10.** GC-MS quantification of HCs degradation from petroleum oil by *A. baumannii* from second day to tenth day.

**Day 2**

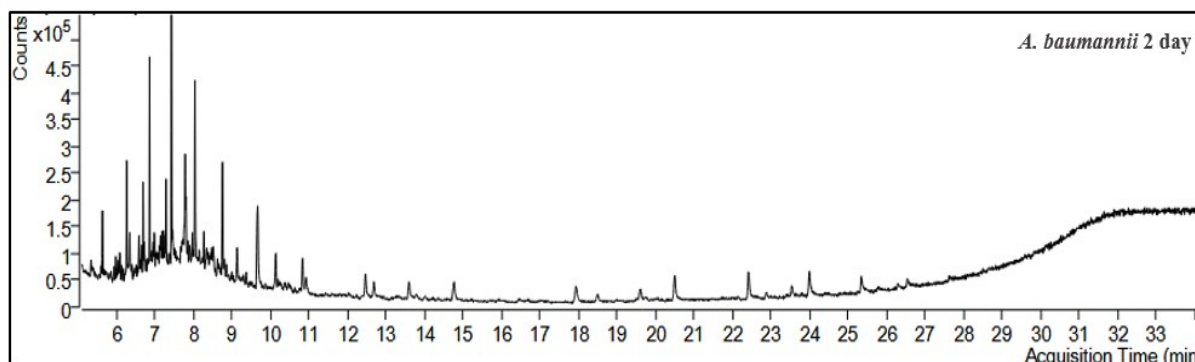

**Table S-2.** GC-MS chromatogram peak list of HCs Compounds detected on second day biodegradation by *A. baumannii*.

| S. No.                       | Name of the Compound          | Type of Hydrocarbon | RT     | Peak Area | Area Percentage                 | Molecular Formula               | Match Score |
|------------------------------|-------------------------------|---------------------|--------|-----------|---------------------------------|---------------------------------|-------------|
| 1                            | Undecane                      | <b>n-Alkane</b>     | 5.629  | 65388     | 1.22                            | C <sub>11</sub> H <sub>24</sub> | 95.7        |
| 2                            | Dodecane                      |                     | 6.261  | 153493    | 2.86                            | C <sub>12</sub> H <sub>26</sub> | 95.2        |
| 3                            | Tridecane                     |                     | 6.853  | 231792    | 4.33                            | C <sub>13</sub> H <sub>28</sub> | 97.1        |
| 4                            | Tetradecane                   |                     | 7.420  | 193947    | 3.62                            | C <sub>14</sub> H <sub>30</sub> | 98.3        |
| 5                            | Pentadecane                   |                     | 8.032  | 179448    | 3.35                            | C <sub>15</sub> H <sub>32</sub> | 93.3        |
| 6                            | Hexadecane                    |                     | 8.747  | 170031    | 3.17                            | C <sub>16</sub> H <sub>34</sub> | 94.7        |
| 7                            | Heptadecane                   |                     | 9.659  | 109676    | 2.04                            | C <sub>17</sub> H <sub>36</sub> | 91.3        |
| 8                            | Octadecane                    |                     | 10.830 | 97085     | 1.81                            | C <sub>18</sub> H <sub>38</sub> | 89.7        |
| <b>n-Alkane percentage</b>   |                               |                     |        |           |                                 | <b>22.44</b>                    |             |
| 9                            | Hexane, 3,3-dimethyl-         | <b>iso-Alkane</b>   | 5.334  | 48710     | 0.91                            | C <sub>8</sub> H <sub>18</sub>  | 91.8        |
| 10                           | Nonane, 5-(2-methylpropyl)-   |                     | 6.038  | 19734     | 0.36                            | C <sub>13</sub> H <sub>28</sub> | 88.4        |
| 11                           | 4,4-Dipropylheptane           |                     | 6.023  | 13450     | 0.25                            | C <sub>13</sub> H <sub>28</sub> | 80.9        |
| 12                           | Octane, 4-ethyl-              |                     | 6.338  | 20140     | 0.37                            | C <sub>10</sub> H <sub>22</sub> | 86.3        |
| 13                           | Undecane, 3-methyl-           |                     | 6.644  | 10868     | 0.20                            | C <sub>12</sub> H <sub>26</sub> | 90.5        |
| 14                           | Undecane, 6-ethyl-            |                     | 6.687  | 75412     | 1.40                            | C <sub>13</sub> H <sub>28</sub> | 86.0        |
| 15                           | Undecane, 4,7-dimethyl-       |                     | 6.976  | 37886     | 0.70                            | C <sub>13</sub> H <sub>28</sub> | 86.2        |
| 16                           | Dodecane, 3-methyl-           |                     | 7.212  | 32334     | 0.60                            | C <sub>13</sub> H <sub>28</sub> | 88.4        |
| 17                           | Dodecane, 2,6,10-trimethyl-   |                     | 7.777  | 32060     | 0.59                            | C <sub>15</sub> H <sub>32</sub> | 90.0        |
| 18                           | Tetradecane, 3-methyl-        |                     | 7.847  | 23327     | 0.43                            | C <sub>15</sub> H <sub>32</sub> | 83.0        |
| 19                           | Heptadecane, 7-methyl-        |                     | 9.127  | 62568     | 1.16                            | C <sub>18</sub> H <sub>38</sub> | 88.7        |
| 20                           | Hexadecane, 2,6,10-trimethyl- |                     | 9.663  | 75792     | 1.41                            | C <sub>19</sub> H <sub>40</sub> | 63.1        |
| 21                           | Undecane, 2-methyl-           |                     | 10.131 | 64558     | 1.20                            | C <sub>12</sub> H <sub>26</sub> | 90.8        |
| 22                           | Nonane, 3,7-dimethyl-         |                     | 10.919 | 40215     | 0.75                            | C <sub>11</sub> H <sub>24</sub> | 89.2        |
| 23                           | Undecane, 3,7-dimethyl-       |                     | 12.461 | 69029     | 1.28                            | C <sub>13</sub> H <sub>28</sub> | 91.3        |
| 24                           | Octane, 3,4,5,6-tetramethyl-  | 27.628              | 17040  | 0.31      | C <sub>12</sub> H <sub>26</sub> | 85.1                            |             |
| 25                           | Butane, 2,2-dimethyl-         | 28.123              | 944    | 0.01      | C <sub>6</sub> H <sub>14</sub>  | 58.6                            |             |
| <b>iso-Alkane percentage</b> |                               |                     |        |           |                                 | <b>12.03</b>                    |             |

|                                          |                                |                     |        |       |      |                                 |      |
|------------------------------------------|--------------------------------|---------------------|--------|-------|------|---------------------------------|------|
| 26                                       | Cyclohexane                    |                     | 5.259  | 3160  | 0.06 | C <sub>6</sub> H <sub>12</sub>  | 61.8 |
| 27                                       | Cyclooctane                    | <b>Cycloalkanes</b> | 6.578  | 31842 | 0.59 | C <sub>8</sub> H <sub>16</sub>  | 82.2 |
| <b>Cycloalkane percentage</b>            |                                |                     |        |       |      | <b>0.65</b>                     |      |
| 28                                       | Benzene, tert-butyl-           |                     | 5.186  | 8182  | 0.15 | C <sub>10</sub> H <sub>14</sub> | 86.2 |
| 29                                       | Benzene, 1,2,3-trimethyl-      |                     | 5.555  | 10203 | 0.19 | C <sub>9</sub> H <sub>12</sub>  | 76.1 |
| 30                                       | Benzene, 1,2,3,5-tetramethyl-  |                     | 6.070  | 26009 | 0.49 | C <sub>10</sub> H <sub>14</sub> | 82.7 |
| 31                                       | Benzene, pentamethyl-          |                     | 6.299  | 21580 | 0.40 | C <sub>11</sub> H <sub>16</sub> | 86.2 |
| 32                                       | p-Cymene                       |                     | 7.116  | 30848 | 0.58 | C <sub>10</sub> H <sub>14</sub> | 87.0 |
| 33                                       | Naphthalene, 1-methyl-         |                     | 7.751  | 49690 | 0.93 | C <sub>12</sub> H <sub>10</sub> | 88.5 |
| 34                                       | Naphthalene, 2-methyl-         |                     | 7.782  | 80856 | 1.51 | C <sub>12</sub> H <sub>10</sub> | 89.9 |
| 35                                       | Naphthalene, 1,2-dimethyl-     |                     | 7.892  | 28170 | 0.53 | C <sub>12</sub> H <sub>12</sub> | 78.4 |
| 36                                       | Naphthalene, 1,5-dimethyl-     |                     | 7.898  | 26596 | 0.50 | C <sub>12</sub> H <sub>12</sub> | 88.4 |
| 37                                       | Naphthalene, 2,6-dimethyl-     | <b>PAHs</b>         | 8.319  | 28949 | 0.54 | C <sub>12</sub> H <sub>12</sub> | 84.6 |
| 38                                       | Naphthalene, 2,3-dimethyl-     |                     | 8.436  | 10186 | 0.19 | C <sub>12</sub> H <sub>12</sub> | 82.9 |
| 39                                       | Naphthalene, 1,6,7-trimethyl-  |                     | 8.446  | 63413 | 1.18 | C <sub>13</sub> H <sub>14</sub> | 83.3 |
| 40                                       | Naphthalene, 2,3,6-trimethyl-  |                     | 8.506  | 28485 | 0.53 | C <sub>13</sub> H <sub>14</sub> | 88.6 |
| 41                                       | Naphthalene, 2-ethyl-          |                     | 8.668  | 10420 | 0.19 | C <sub>12</sub> H <sub>12</sub> | 85.3 |
| 42                                       | 1,4,5,8-Tetramethylnaphthalene |                     | 8.752  | 57238 | 1.07 | C <sub>14</sub> H <sub>16</sub> | 81.0 |
| 43                                       | Anthracene, 2-methyl-          |                     | 19.900 | 7938  | 0.15 | C <sub>15</sub> H <sub>12</sub> | 84.3 |
|                                          | Phenanthrene, 2-methyl-        |                     | 20.033 | 6510  | 0.12 | C <sub>15</sub> H <sub>12</sub> | 80.5 |
| 44                                       | Dibenzo[fg,ij]pentaphene       |                     | 32.015 | 875   | 0.02 | C <sub>28</sub> H <sub>16</sub> | 86.8 |
| <b>PAHs percentage</b>                   |                                |                     |        |       |      | <b>9.27</b>                     |      |
| <b>Aliphatic Hydrocarbons percentage</b> |                                |                     |        |       |      | <b>35.13</b>                    |      |
| <b>HCs percentage</b>                    |                                |                     |        |       |      | <b>44.40</b>                    |      |

#### Day 4

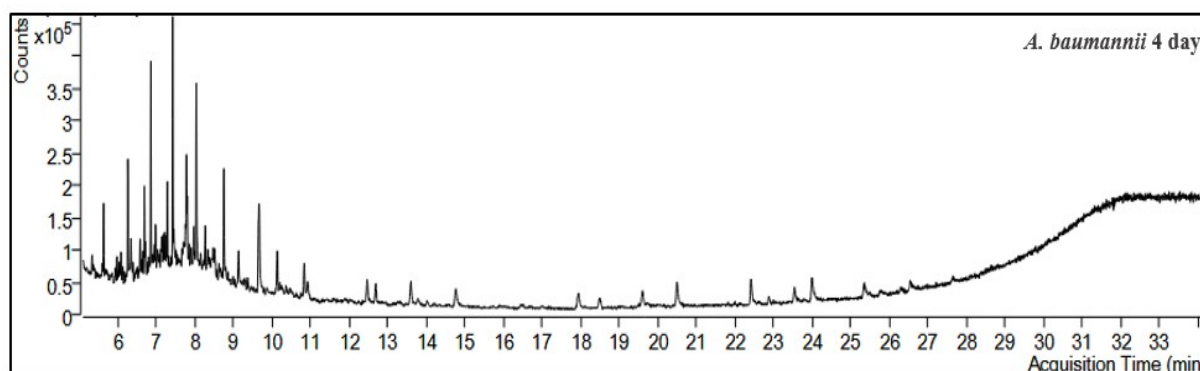

**Table S-3.** GC-MS chromatogram peak list of HCs Compounds detected on fourth day biodegradation by *A. baumannii*.

| S. | Name of the Compound | Type of | RT | Peak | Area | Molecular | Match |
|----|----------------------|---------|----|------|------|-----------|-------|
|----|----------------------|---------|----|------|------|-----------|-------|

| No.                           | Hydrocarbon                   | Area   | Percentage | Formula | Score                           |      |
|-------------------------------|-------------------------------|--------|------------|---------|---------------------------------|------|
| 1                             | Undecane                      | 5.619  | 55234      | 1.53    | C <sub>11</sub> H <sub>24</sub> | 95.4 |
| 2                             | Dodecane                      | 6.261  | 110274     | 3.06    | C <sub>12</sub> H <sub>26</sub> | 97.2 |
| 3                             | Tridecane                     | 6.853  | 183213     | 5.09    | C <sub>13</sub> H <sub>28</sub> | 97.1 |
| 4                             | Tetradecane                   | 7.424  | 152088     | 4.22    | C <sub>14</sub> H <sub>30</sub> | 98.4 |
| 5                             | Pentadecane                   | 8.032  | 135824     | 3.77    | C <sub>15</sub> H <sub>32</sub> | 95.3 |
| 6                             | Hexadecane                    | 8.546  | 186077     | 5.17    | C <sub>16</sub> H <sub>34</sub> | 94.7 |
| 7                             | Heptadecane                   | 9.600  | 80948      | 2.25    | C <sub>17</sub> H <sub>36</sub> | 94.3 |
| 8                             | Octadecane                    | 10.629 | 8085       | 0.22    | C <sub>18</sub> H <sub>38</sub> | 89.2 |
| <b>n-Alkane percentage</b>    |                               |        |            |         | <b>25.33</b>                    |      |
| 9                             | Hexane, 3,3-dimethyl-         | 5.331  | 31363      | 0.87    | C <sub>8</sub> H <sub>18</sub>  | 93.8 |
| 10                            | Nonane, 5-(2-methylpropyl)-   | 6.069  | 12734      | 0.35    | C <sub>13</sub> H <sub>28</sub> | 88.4 |
| 11                            | 4,4-Dipropylheptane           | 6.086  | 10032      | 0.28    | C <sub>13</sub> H <sub>28</sub> | 80.9 |
| 12                            | Octane, 4-ethyl-              | 6.306  | 15487      | 0.43    | C <sub>10</sub> H <sub>22</sub> | 88.3 |
| 13                            | Undecane, 3-methyl-           | 6.642  | 9978       | 0.28    | C <sub>12</sub> H <sub>26</sub> | 90.5 |
| 14                            | Undecane, 6-ethyl-            | 6.686  | 68062      | 1.89    | C <sub>13</sub> H <sub>28</sub> | 86.0 |
| 15                            | Undecane, 4,7-dimethyl-       | 6.816  | 33733      | 0.94    | C <sub>13</sub> H <sub>28</sub> | 86.2 |
| 16                            | Dodecane, 3-methyl-           | 7.174  | 27550      | 0.76    | C <sub>13</sub> H <sub>28</sub> | 88.9 |
| 17                            | Dodecane, 2,6,10-trimethyl-   | 7.789  | 21323      | 0.59    | C <sub>15</sub> H <sub>32</sub> | 90.0 |
| 18                            | Tetradecane, 3-methyl-        | 7.793  | 204274     | 5.67    | C <sub>15</sub> H <sub>32</sub> | 83.0 |
| 19                            | Heptadecane, 7-methyl-        | 9.147  | 12693      | 0.35    | C <sub>18</sub> H <sub>38</sub> | 88.7 |
| 20                            | Hexadecane, 2,6,10-trimethyl- | 9.628  | 70625      | 1.96    | C <sub>19</sub> H <sub>40</sub> | 83.1 |
| 21                            | Undecane, 2-methyl-           | 10.158 | 43096      | 1.20    | C <sub>12</sub> H <sub>26</sub> | 90.8 |
| 22                            | Nonane, 3,7-dimethyl-         | 10.830 | 36350      | 1.01    | C <sub>11</sub> H <sub>24</sub> | 90.2 |
| 23                            | Undecane, 3,7-dimethyl-       | 12.584 | 58836      | 1.63    | C <sub>13</sub> H <sub>28</sub> | 91.3 |
| 24                            | Octane, 3,4,5,6-tetramethyl-  | 27.518 | 5657       | 0.16    | C <sub>12</sub> H <sub>26</sub> | 85.1 |
| 25                            | Butane, 2,2-dimethyl-         | 28.296 | 634        | 0.02    | C <sub>6</sub> H <sub>14</sub>  | 88.6 |
| <b>iso-Alkane percentage</b>  |                               |        |            |         | <b>18.40</b>                    |      |
| 26                            | Cyclohexane                   | 6.549  | 2328       | 0.06    | C <sub>6</sub> H <sub>12</sub>  | 81.8 |
| 27                            | Cyclooctane                   | 6.534  | 23769      | 0.66    | C <sub>8</sub> H <sub>16</sub>  | 82.2 |
| <b>Cycloalkane percentage</b> |                               |        |            |         | <b>0.72</b>                     |      |
| 28                            | Benzene, tert-butyl-          | 5.185  | 6910       | 0.19    | C <sub>10</sub> H <sub>14</sub> | 84.2 |
| 29                            | Benzene, 1,2,3-trimethyl-     | 6.045  | 9585       | 0.27    | C <sub>9</sub> H <sub>12</sub>  | 76.1 |
| 30                            | Benzene, 1,2,3,5-tetramethyl- | 6.370  | 10956      | 0.30    | C <sub>10</sub> H <sub>14</sub> | 82.7 |
| 31                            | Benzene, pentamethyl-         | 6.489  | 12649      | 0.35    | C <sub>11</sub> H <sub>16</sub> | 89.2 |
| 32                            | p-Cymene                      | 6.516  | 23824      | 0.66    | C <sub>10</sub> H <sub>14</sub> | 87.0 |
| 33                            | Naphthalene, 1-methyl-        | 7.454  | 30277      | 0.84    | C <sub>12</sub> H <sub>10</sub> | 86.5 |
| 34                            | Naphthalene, 2-methyl-        | 7.182  | 66361      | 1.84    | C <sub>12</sub> H <sub>10</sub> | 89.9 |
| 35                            | Naphthalene, 1,2-dimethyl-    | 7.692  | 15473      | 0.43    | C <sub>12</sub> H <sub>12</sub> | 74.4 |
| 36                            | Naphthalene, 1,5-dimethyl-    | 7.798  | 20250      | 0.56    | C <sub>12</sub> H <sub>12</sub> | 80.4 |
| 37                            | Naphthalene, 2,6-dimethyl-    | 7.789  | 23485      | 0.65    | C <sub>12</sub> H <sub>12</sub> | 81.6 |
| 38                            | Naphthalene, 2,3-dimethyl-    | 7.481  | 8055       | 0.22    | C <sub>12</sub> H <sub>12</sub> | 82.9 |
| 39                            | Naphthalene, 1,6,7-trimethyl- | 8.444  | 48860      | 1.36    | C <sub>13</sub> H <sub>14</sub> | 83.3 |
| 40                            | Naphthalene, 2,3,6-           | 8.505  | 20560      | 0.57    | C <sub>13</sub> H <sub>14</sub> | 85.6 |

|                                          |                                                  |        |       |      |                                 |              |
|------------------------------------------|--------------------------------------------------|--------|-------|------|---------------------------------|--------------|
| 41                                       | trimethyl-<br>Naphthalene, 2-ethyl-<br>1,4,5,8-  | 8.222  | 8781  | 0.24 | C <sub>12</sub> H <sub>12</sub> | 85.1         |
| 42                                       | Tetramethylnaphthalene                           | 10.142 | 41808 | 1.16 | C <sub>14</sub> H <sub>16</sub> | 80.0         |
| 43                                       | Anthracene, 2-methyl-<br>Phenanthrene, 2-methyl- | 28.500 | 6571  | 0.18 | C <sub>15</sub> H <sub>12</sub> | 84.3         |
| 44                                       | Dibenzo[fg,ij]pentaphene                         | 30.013 | 4893  | 0.13 | C <sub>15</sub> H <sub>12</sub> | 81.5         |
|                                          |                                                  | 32.033 | 572   | 0.01 | C <sub>28</sub> H <sub>16</sub> | 86.8         |
| <b>PAHs percentage</b>                   |                                                  |        |       |      |                                 | <b>10.00</b> |
| <b>Aliphatic Hydrocarbons percentage</b> |                                                  |        |       |      |                                 | <b>44.64</b> |
| <b>HCs percentage</b>                    |                                                  |        |       |      |                                 | <b>54.64</b> |

### Day 6

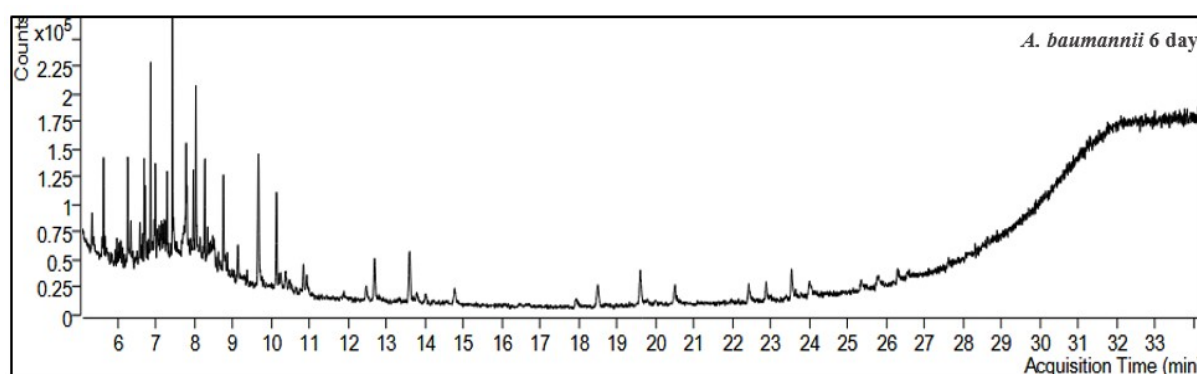

**Table S-4.** GC-MS chromatogram peak list of HCs Compounds detected on sixth day biodegradation by *A. baumannii*.

| S. No.                     | Name of the Compound        | Type of Hydrocarbon | RT     | Peak Area | Area Percentage | Molecular Formula               | Match Score |
|----------------------------|-----------------------------|---------------------|--------|-----------|-----------------|---------------------------------|-------------|
| 1                          | Undecane                    | <b>n-Alkane</b>     | 5.421  | 32721     | 1.89            | C <sub>11</sub> H <sub>24</sub> | 94.4        |
| 2                          | Dodecane                    |                     | 6.653  | 81827     | 4.72            | C <sub>12</sub> H <sub>26</sub> | 84.1        |
| 3                          | Tridecane                   |                     | 6.810  | 107409    | 6.19            | C <sub>13</sub> H <sub>28</sub> | 89.5        |
| 4                          | Tetradecane                 |                     | 7.432  | 68089     | 3.93            | C <sub>14</sub> H <sub>30</sub> | 86.4        |
| 5                          | Pentadecane                 |                     | 8.063  | 95801     | 5.52            | C <sub>15</sub> H <sub>32</sub> | 92.1        |
| 6                          | Hexadecane                  |                     | 8.352  | 85061     | 4.90            | C <sub>16</sub> H <sub>34</sub> | 83.6        |
| 7                          | Heptadecane                 |                     | 9.669  | 71948     | 4.15            | C <sub>17</sub> H <sub>36</sub> | 88.1        |
| 8                          | Octadecane                  |                     | 10.463 | 6047      | 0.35            | C <sub>18</sub> H <sub>38</sub> | 82.2        |
| <b>n-Alkane percentage</b> |                             |                     |        |           |                 | <b>31.65</b>                    |             |
| 9                          | Hexane, 3,3-dimethyl-       | <b>iso-Alkane</b>   | 5.329  | 21001     | 1.21            | C <sub>8</sub> H <sub>18</sub>  | 94.4        |
| 10                         | Nonane, 5-(2-methylpropyl)- |                     | 6.331  | 8523      | 0.49            | C <sub>13</sub> H <sub>28</sub> | 86.1        |
| 11                         | 4,4-Dipropylheptane         |                     | 6.686  | 7689      | 0.44            | C <sub>13</sub> H <sub>28</sub> | 88.5        |
| 12                         | Octane, 4-ethyl-            |                     | 6.734  | 10178     | 0.59            | C <sub>10</sub> H <sub>22</sub> | 86.0        |
| 13                         | Undecane, 3-methyl-         |                     | 6.671  | 8205      | 0.47            | C <sub>12</sub> H <sub>26</sub> | 92.1        |
| 14                         | Undecane, 6-ethyl-          |                     | 6.680  | 46741     | 2.69            | C <sub>13</sub> H <sub>28</sub> | 83.6        |
| 15                         | Undecane, 4,7-dimethyl-     |                     | 6.866  | 20037     | 1.15            | C <sub>13</sub> H <sub>28</sub> | 88.2        |
| 16                         | Dodecane, 3-methyl-         |                     | 7.850  | 7278      | 0.42            | C <sub>13</sub> H <sub>28</sub> | 65.2        |
| 17                         | Dodecane, 2,6,10-trimethyl- |                     | 7.969  | 8459      | 0.49            | C <sub>15</sub> H <sub>32</sub> | 89.8        |
| 18                         | Tetradecane, 3-methyl-      |                     | 7.766  | 92347     | 5.32            | C <sub>15</sub> H <sub>32</sub> | 89.6        |

|                                          |                                |                     |        |       |                                 |                                 |      |
|------------------------------------------|--------------------------------|---------------------|--------|-------|---------------------------------|---------------------------------|------|
| 19                                       | Heptadecane, 7-methyl-         |                     | 9.128  | 10144 | 0.58                            | C <sub>18</sub> H <sub>38</sub> | 86.2 |
| 20                                       | Hexadecane, 2,6,10-trimethyl-  |                     | 9.660  | 52136 | 3.01                            | C <sub>19</sub> H <sub>40</sub> | 93.5 |
| 21                                       | Undecane, 2-methyl-            |                     | 10.130 | 23523 | 1.36                            | C <sub>12</sub> H <sub>26</sub> | 90.2 |
| 22                                       | Nonane, 3,7-dimethyl-          |                     | 10.832 | 27981 | 1.61                            | C <sub>11</sub> H <sub>24</sub> | 85.3 |
| 23                                       | Undecane, 3,7-dimethyl-        |                     | 12.591 | 42457 | 2.45                            | C <sub>13</sub> H <sub>28</sub> | 83.4 |
| 24                                       | Octane, 3,4,5,6-tetramethyl-   |                     | 27.629 | 30781 | 1.77                            | C <sub>12</sub> H <sub>26</sub> | 91.4 |
| 25                                       | Butane, 2,2-dimethyl-          |                     | 28.331 | 230   | 0.01                            | C <sub>6</sub> H <sub>14</sub>  | 86.1 |
| <b>iso-Alkane percentage</b>             |                                |                     |        |       |                                 | <b>24.09</b>                    |      |
| 26                                       | Cyclohexane                    | <b>Cycloalkanes</b> | 6.551  | 1431  | 0.08                            | C <sub>6</sub> H <sub>12</sub>  | 81.0 |
| 27                                       | Cyclooctane                    |                     | 6.564  | 10681 | 0.62                            | C <sub>8</sub> H <sub>16</sub>  | 81.3 |
| <b>Cycloalkane percentage</b>            |                                |                     |        |       |                                 | <b>0.70</b>                     |      |
| 28                                       | Benzene, tert-butyl-           | <b>PAHs</b>         | 5.181  | 6139  | 0.35                            | C <sub>10</sub> H <sub>14</sub> | 84.9 |
| 29                                       | Benzene, 1,2,3-trimethyl-      |                     | 6.048  | 5284  | 0.30                            | C <sub>9</sub> H <sub>12</sub>  | 94.4 |
| 30                                       | Benzene, 1,2,3,5-tetramethyl-  |                     | 6.372  | 7329  | 0.42                            | C <sub>10</sub> H <sub>14</sub> | 86.9 |
| 31                                       | Benzene, pentamethyl-          |                     | 6.490  | 8104  | 0.47                            | C <sub>11</sub> H <sub>16</sub> | 89.6 |
| 32                                       | p-Cymene                       |                     | 6.516  | 18567 | 1.07                            | C <sub>10</sub> H <sub>14</sub> | 93.5 |
| 33                                       | Naphthalene, 1-methyl-         |                     | 7.051  | 17784 | 1.02                            | C <sub>12</sub> H <sub>10</sub> | 91.9 |
| 34                                       | Naphthalene, 2-methyl-         |                     | 7.181  | 27237 | 1.57                            | C <sub>12</sub> H <sub>10</sub> | 84.3 |
| 35                                       | Naphthalene, 1,2-dimethyl-     |                     | 7.692  | 10097 | 0.58                            | C <sub>12</sub> H <sub>12</sub> | 85.3 |
| 36                                       | Naphthalene, 1,5-dimethyl-     |                     | 7.798  | 12170 | 0.70                            | C <sub>12</sub> H <sub>12</sub> | 90.1 |
| 37                                       | Naphthalene, 2,6-dimethyl-     |                     | 7.785  | 18281 | 1.05                            | C <sub>12</sub> H <sub>12</sub> | 94.9 |
| 38                                       | Naphthalene, 2,3-dimethyl-     |                     | 7.481  | 6013  | 0.35                            | C <sub>12</sub> H <sub>12</sub> | 94.6 |
| 39                                       | Naphthalene, 1,6,7-trimethyl-  |                     | 8.440  | 29840 | 1.72                            | C <sub>13</sub> H <sub>14</sub> | 86.9 |
| 40                                       | Naphthalene, 2,3,6-trimethyl-  |                     | 8.505  | 15570 | 0.90                            | C <sub>13</sub> H <sub>14</sub> | 94.6 |
| 41                                       | Naphthalene, 2-ethyl-          |                     | 8.622  | 6741  | 0.39                            | C <sub>12</sub> H <sub>12</sub> | 93.5 |
| 42                                       | 1,4,5,8-Tetramethylnaphthalene |                     | 10.154 | 31708 | 1.83                            | C <sub>14</sub> H <sub>16</sub> | 81.9 |
| 43                                       | Anthracene, 2-methyl-          |                     | 28.503 | 4541  | 0.26                            | C <sub>7</sub> H <sub>7</sub> N | 94.3 |
|                                          | Phenanthrene, 2-methyl-        | 30.013              | 2993   | 0.17  | C <sub>15</sub> H <sub>12</sub> | 85.7                            |      |
| 44                                       | Dibenzo[fg,ij]pentaphene       | 32.031              | 130    | 0.0   | C <sub>28</sub> H <sub>16</sub> | 90.1                            |      |
| <b>PAHs percentage</b>                   |                                |                     |        |       |                                 | <b>13.18</b>                    |      |
| <b>Aliphatic Hydrocarbons percentage</b> |                                |                     |        |       |                                 | <b>56.44</b>                    |      |
| <b>HCs percentage</b>                    |                                |                     |        |       |                                 | <b>69.62</b>                    |      |

## Day 8

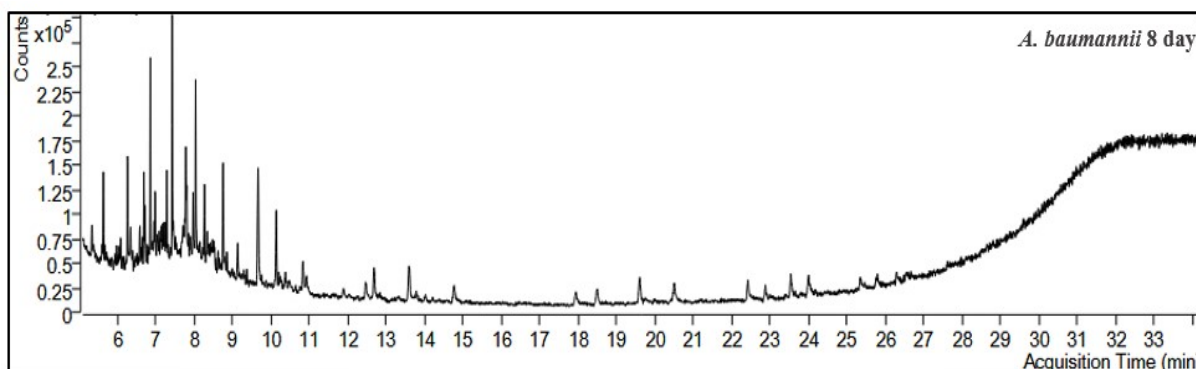

**Table S-5.** GC-MS chromatogram peak list of HCs Compounds detected on eighth day biodegradation by *A. baumannii*.

| S. No.                        | Name of the Compound          | Type of Hydrocarbon | RT     | Peak Area | Area Percentage                 | Molecular Formula               | Match Score |
|-------------------------------|-------------------------------|---------------------|--------|-----------|---------------------------------|---------------------------------|-------------|
| 1                             | Undecane                      | <b>n-Alkane</b>     | 5.641  | 14761     | 1.48                            | C <sub>11</sub> H <sub>24</sub> | 86.6        |
| 2                             | Dodecane                      |                     | 6.852  | 54787     | 5.51                            | C <sub>12</sub> H <sub>26</sub> | 90.2        |
| 3                             | Tridecane                     |                     | 6.480  | 84472     | 8.50                            | C <sub>13</sub> H <sub>28</sub> | 86.0        |
| 4                             | Tetradecane                   |                     | 7.467  | 37526     | 3.77                            | C <sub>14</sub> H <sub>30</sub> | 84.0        |
| 5                             | Pentadecane                   |                     | 8.047  | 78519     | 7.90                            | C <sub>15</sub> H <sub>32</sub> | 92.7        |
| 6                             | Hexadecane                    |                     | 8.766  | 62011     | 6.24                            | C <sub>16</sub> H <sub>34</sub> | 86.4        |
| 7                             | Heptadecane                   |                     | 9.632  | 58347     | 5.87                            | C <sub>17</sub> H <sub>36</sub> | 86.2        |
| 8                             | Octadecane                    |                     | 10.794 | 4135      | 0.42                            | C <sub>18</sub> H <sub>38</sub> | 94.3        |
| <b>n-Alkane percentage</b>    |                               |                     |        |           |                                 | <b>39.69</b>                    |             |
| 9                             | Hexane, 3,3-dimethyl-         | <b>iso-Alkane</b>   | 5.322  | 10027     | 1.01                            | C <sub>8</sub> H <sub>18</sub>  | 90.1        |
| 10                            | Nonane, 5-(2-methylpropyl)-   |                     | 6.397  | 5696      | 0.57                            | C <sub>13</sub> H <sub>28</sub> | 93.4        |
| 11                            | 4,4-Dipropylheptane           |                     | 6.677  | 6817      | 0.68                            | C <sub>13</sub> H <sub>28</sub> | 97.1        |
| 12                            | Octane, 4-ethyl-              |                     | 6.788  | 9274      | 0.93                            | C <sub>10</sub> H <sub>22</sub> | 86.0        |
| 13                            | Undecane, 3-methyl-           |                     | 6.676  | 6583      | 0.66                            | C <sub>12</sub> H <sub>26</sub> | 90.6        |
| 14                            | Undecane, 6-ethyl-            |                     | 6.612  | 32272     | 3.25                            | C <sub>13</sub> H <sub>28</sub> | 83.1        |
| 15                            | Undecane, 4,7-dimethyl-       |                     | 6.855  | 10078     | 1.01                            | C <sub>13</sub> H <sub>28</sub> | 83.6        |
| 16                            | Dodecane, 3-methyl-           |                     | 7.804  | 5884      | 0.59                            | C <sub>13</sub> H <sub>28</sub> | 87.2        |
| 17                            | Dodecane, 2,6,10-trimethyl-   |                     | 7.966  | 5339      | 0.54                            | C <sub>15</sub> H <sub>32</sub> | 84.1        |
| 18                            | Tetradecane, 3-methyl-        |                     | 7.767  | 41196     | 4.14                            | C <sub>15</sub> H <sub>32</sub> | 90.8        |
| 19                            | Heptadecane, 7-methyl-        |                     | 9.100  | 8363      | 0.84                            | C <sub>18</sub> H <sub>38</sub> | 89.0        |
| 20                            | Hexadecane, 2,6,10-trimethyl- |                     | 9.650  | 42845     | 4.31                            | C <sub>19</sub> H <sub>40</sub> | 92.4        |
| 21                            | Undecane, 2-methyl-           |                     | 10.131 | 10117     | 1.02                            | C <sub>12</sub> H <sub>26</sub> | 91.2        |
| 22                            | Nonane, 3,7-dimethyl-         |                     | 10.885 | 11461     | 1.15                            | C <sub>11</sub> H <sub>24</sub> | 89.3        |
| 23                            | Undecane, 3,7-dimethyl-       |                     | 12.433 | 18457     | 1.86                            | C <sub>13</sub> H <sub>28</sub> | 90.1        |
| 24                            | Octane, 3,4,5,6-tetramethyl-  |                     | 27.605 | 15784     | 1.59                            | C <sub>12</sub> H <sub>26</sub> | 93.4        |
| <b>iso-Alkane percentage</b>  |                               |                     |        |           |                                 | <b>24.16</b>                    |             |
| 25                            | Cyclohexane                   | <b>Cycloalkanes</b> | 6.809  | 945       | 0.09                            | C <sub>6</sub> H <sub>12</sub>  | 92.9        |
| 26                            | Cyclooctane                   |                     | 6.505  | 7961      | 0.80                            | C <sub>8</sub> H <sub>16</sub>  | 91.2        |
| <b>Cycloalkane percentage</b> |                               |                     |        |           |                                 | <b>0.89</b>                     |             |
| 28                            | Benzene, tert-butyl-          | <b>PAHs</b>         | 5.063  | 40418     | 4.07                            | C <sub>10</sub> H <sub>14</sub> | 93.6        |
| 29                            | Benzene, 1,2,3-trimethyl-     |                     | 6.021  | 3457      | 0.35                            | C <sub>9</sub> H <sub>12</sub>  | 89.0        |
| 30                            | Benzene, 1,2,3,5-tetramethyl- |                     | 6.132  | 6521      | 0.66                            | C <sub>10</sub> H <sub>14</sub> | 84.9        |
| 31                            | Benzene, pentamethyl-         |                     | 6.458  | 5490      | 0.55                            | C <sub>11</sub> H <sub>16</sub> | 86.4        |
| 32                            | p-Cymene                      |                     | 6.514  | 10319     | 1.04                            | C <sub>10</sub> H <sub>14</sub> | 81.9        |
| 33                            | Naphthalene, 1-methyl-        |                     | 7.006  | 13496     | 1.36                            | C <sub>12</sub> H <sub>10</sub> | 80.4        |
| 34                            | Naphthalene, 2-methyl-        |                     | 7.157  | 15844     | 1.59                            | C <sub>12</sub> H <sub>10</sub> | 91.3        |
| 35                            | Naphthalene, 1,2-dimethyl-    |                     | 7.621  | 9105      | 0.92                            | C <sub>12</sub> H <sub>12</sub> | 87.3        |
| 36                            | Naphthalene, 1,5-dimethyl-    |                     | 7.711  | 7703      | 0.77                            | C <sub>12</sub> H <sub>12</sub> | 83.4        |
| 37                            | Naphthalene, 2,6-dimethyl-    |                     | 7.700  | 3916      | 0.39                            | C <sub>12</sub> H <sub>12</sub> | 89.0        |
| 38                            | Naphthalene, 2,3-             | 7.409               | 4852   | 0.49      | C <sub>12</sub> H <sub>12</sub> | 84.9                            |             |

|                                          |                                                |        |       |      |                                 |              |
|------------------------------------------|------------------------------------------------|--------|-------|------|---------------------------------|--------------|
| 39                                       | dimethyl-<br>Naphthalene, 1,6,7-<br>trimethyl- | 8.427  | 17078 | 1.72 | C <sub>13</sub> H <sub>14</sub> | 86.7         |
| 40                                       | Naphthalene, 2,3,6-<br>trimethyl-              | 8.518  | 10258 | 1.03 | C <sub>13</sub> H <sub>14</sub> | 84.9         |
| 41                                       | Naphthalene, 2-ethyl-<br>1,4,5,8-              | 8.618  | 5417  | 0.54 | C <sub>12</sub> H <sub>12</sub> | 96.4         |
| 42                                       | Tetramethylnaphthalene                         | 10.109 | 20781 | 2.09 | C <sub>14</sub> H <sub>16</sub> | 80.3         |
| 43                                       | Anthracene, 2-methyl-                          | 28.501 | 2487  | 0.25 | C <sub>15</sub> H <sub>12</sub> | 87.4         |
| 44                                       | Phenanthrene, 2-methyl-                        | 30.018 | 1438  | 0.14 | C <sub>15</sub> H <sub>12</sub> | 81.8         |
| <b>PAHs percentage</b>                   |                                                |        |       |      |                                 | <b>17.97</b> |
| <b>Aliphatic Hydrocarbons percentage</b> |                                                |        |       |      |                                 | <b>64.75</b> |
| <b>HCs percentage</b>                    |                                                |        |       |      |                                 | <b>82.72</b> |

### Day 10

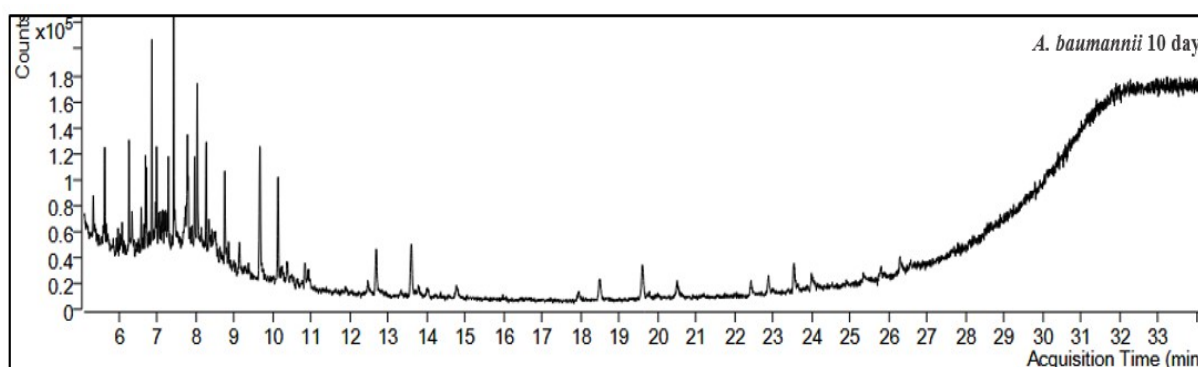

**Table S-6.** GC-MS chromatogram peak list of HCs Compounds detected on tenth day biodegradation by *A. baumannii*.

| S. No.                     | Name of the Compound        | Type of Hydrocarbon | RT     | Peak Area | Area Percentage | Molecular Formula               | Match Score |
|----------------------------|-----------------------------|---------------------|--------|-----------|-----------------|---------------------------------|-------------|
| 1                          | Undecane                    | <b>n-Alkane</b>     | 5.642  | 12834     | 1.64            | C <sub>11</sub> H <sub>24</sub> | 80.8        |
| 2                          | Dodecane                    |                     | 6.705  | 46821     | 5.97            | C <sub>12</sub> H <sub>26</sub> | 83.3        |
| 3                          | Tridecane                   |                     | 6.420  | 75514     | 9.63            | C <sub>13</sub> H <sub>28</sub> | 87.6        |
| 4                          | Tetradecane                 |                     | 7.432  | 35929     | 4.58            | C <sub>14</sub> H <sub>30</sub> | 92.7        |
| 5                          | Pentadecane                 |                     | 8.146  | 63281     | 8.07            | C <sub>15</sub> H <sub>32</sub> | 90.8        |
| 6                          | Hexadecane                  |                     | 8.465  | 56217     | 7.17            | C <sub>16</sub> H <sub>34</sub> | 95.3        |
| 7                          | Heptadecane                 |                     | 9.531  | 44751     | 5.71            | C <sub>17</sub> H <sub>36</sub> | 83.6        |
| 8                          | Octadecane                  |                     | 10.614 | 3301      | 0.42            | C <sub>18</sub> H <sub>38</sub> | 84.5        |
| <b>n-Alkane percentage</b> |                             |                     |        |           |                 | <b>43.19</b>                    |             |
| 9                          | Hexane, 3,3-dimethyl-       | <b>iso-Alkane</b>   | 5.216  | 9332      | 1.19            | C <sub>8</sub> H <sub>18</sub>  | 81.1        |
| 10                         | Nonane, 5-(2-methylpropyl)- |                     | 6.391  | 4414      | 0.56            | C <sub>13</sub> H <sub>28</sub> | 94.4        |
| 11                         | 4,4-Dipropylheptane         |                     | 6.646  | 5992      | 0.76            | C <sub>13</sub> H <sub>28</sub> | 85.2        |
| 12                         | Octane, 4-ethyl-            |                     | 6.781  | 7817      | 1.00            | C <sub>10</sub> H <sub>22</sub> | 80.1        |
| 13                         | Undecane, 3-methyl-         |                     | 6.534  | 5364      | 0.68            | C <sub>12</sub> H <sub>26</sub> | 86.8        |
| 14                         | Undecane, 6-ethyl-          |                     | 6.642  | 23407     | 2.98            | C <sub>13</sub> H <sub>28</sub> | 81.9        |
| 15                         | Undecane, 4,7-dimethyl-     |                     | 6.830  | 4887      | 0.62            | C <sub>13</sub> H <sub>28</sub> | 87.3        |

|                                          |                                |                     |        |       |       |                                 |      |
|------------------------------------------|--------------------------------|---------------------|--------|-------|-------|---------------------------------|------|
| 16                                       | Dodecane, 3-methyl-            |                     | 7.815  | 22115 | 2.82  | C <sub>13</sub> H <sub>28</sub> | 91.9 |
| 17                                       | Dodecane, 2,6,10-trimethyl-    |                     | 7.921  | 4936  | 0.63  | C <sub>15</sub> H <sub>32</sub> | 92.0 |
| 18                                       | Tetradecane, 3-methyl-         |                     | 7.722  | 31124 | 3.97  | C <sub>15</sub> H <sub>32</sub> | 95.1 |
| 19                                       | Heptadecane, 7-methyl-         |                     | 9.125  | 7760  | 0.99  | C <sub>18</sub> H <sub>38</sub> | 85.3 |
| 20                                       | Hexadecane, 2,6,10-trimethyl-  |                     | 9.619  | 34786 | 4.444 | C <sub>19</sub> H <sub>40</sub> | 84.5 |
| 21                                       | Undecane, 2-methyl-            |                     | 10.132 | 8500  | 1.08  | C <sub>12</sub> H <sub>26</sub> | 86.4 |
| 22                                       | Nonane, 3,7-dimethyl-          |                     | 10.803 | 9984  | 1.27  | C <sub>11</sub> H <sub>24</sub> | 95.4 |
| 23                                       | Undecane, 3,7-dimethyl-        |                     | 12.436 | 14181 | 1.81  | C <sub>13</sub> H <sub>28</sub> | 81.4 |
| 24                                       | Octane, 3,4,5,6-tetramethyl-   |                     | 27.667 | 10361 | 1.32  | C <sub>12</sub> H <sub>26</sub> | 80.7 |
| <b>iso-Alkane percentage</b>             |                                |                     |        |       |       | <b>26.14</b>                    |      |
| 25                                       | Cyclooctane                    | <b>Cycloalkanes</b> | 6.318  | 2473  | 0.31  | C <sub>8</sub> H <sub>16</sub>  | 98.1 |
| <b>Cycloalkane percentage</b>            |                                |                     |        |       |       | <b>0.31</b>                     |      |
| 26                                       | Benzene, tert-butyl-           |                     | 5.041  | 31497 | 4.02  | C <sub>10</sub> H <sub>14</sub> | 90.1 |
| 27                                       | Benzene, 1,2,3-trimethyl-      |                     | 6.014  | 2738  | 0.35  | C <sub>9</sub> H <sub>12</sub>  | 96.4 |
| 28                                       | Benzene, 1,2,3,5-tetramethyl-  |                     | 6.150  | 5455  | 0.69  | C <sub>10</sub> H <sub>14</sub> | 92.3 |
| 29                                       | p-Cymene                       |                     | 6.187  | 9327  | 1.19  | C <sub>10</sub> H <sub>14</sub> | 82.1 |
| 30                                       | Naphthalene, 1-methyl-         |                     | 7.605  | 12434 | 1.58  | C <sub>12</sub> H <sub>10</sub> | 83.7 |
| 31                                       | Naphthalene, 2-methyl-         |                     | 7.171  | 12734 | 1.62  | C <sub>12</sub> H <sub>10</sub> | 80.4 |
| 32                                       | Naphthalene, 1,2-dimethyl-     |                     | 7.646  | 8134  | 1.04  | C <sub>12</sub> H <sub>12</sub> | 95.3 |
| 33                                       | Naphthalene, 1,5-dimethyl-     |                     | 7.714  | 6904  | 0.88  | C <sub>12</sub> H <sub>12</sub> | 90.7 |
| 34                                       | Naphthalene, 2,6-dimethyl-     |                     | 7.751  | 3715  | 0.47  | C <sub>12</sub> H <sub>12</sub> | 95.6 |
| 35                                       | Naphthalene, 2,3-dimethyl-     |                     | 7.474  | 4027  | 0.51  | C <sub>12</sub> H <sub>12</sub> | 88.9 |
| 36                                       | Naphthalene, 1,6,7-trimethyl-  |                     | 8.424  | 15062 | 1.92  | C <sub>13</sub> H <sub>14</sub> | 85.1 |
| 37                                       | Naphthalene, 2,3,6-trimethyl-  | <b>PAHs</b>         | 8.516  | 9837  | 1.25  | C <sub>13</sub> H <sub>14</sub> | 89.4 |
| 38                                       | Naphthalene, 2-ethyl-          |                     | 8.643  | 4834  | 0.62  | C <sub>12</sub> H <sub>12</sub> | 80.4 |
| 39                                       | 1,4,5,8-Tetramethylnaphthalene |                     | 10.179 | 15379 | 1.96  | C <sub>14</sub> H <sub>16</sub> | 91.8 |
| 40                                       | Anthracene, 2-methyl-          |                     | 28.571 | 1867  | 0.24  | C <sub>15</sub> H <sub>12</sub> | 92.1 |
| 41                                       | Phenanthrene, 2-methyl-        |                     | 30.740 | 1069  | 0.14  | C <sub>15</sub> H <sub>12</sub> | 86.4 |
| <b>PAHs percentage</b>                   |                                |                     |        |       |       | <b>18.49</b>                    |      |
| <b>Aliphatic Hydrocarbons percentage</b> |                                |                     |        |       |       | <b>69.65</b>                    |      |
| <b>HCs percentage</b>                    |                                |                     |        |       |       | <b>88.14</b>                    |      |

**SI-11.** GC-MS quantification of HCs degradation from petroleum oil by m-NBR platform from second day to sixth day.

**Day2**

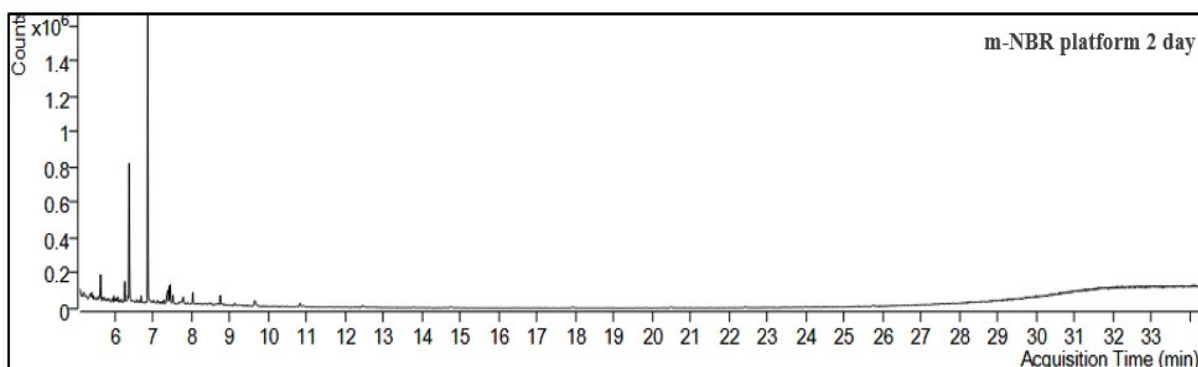

**Table S-7.** GC-MS chromatogram peak list of HCs Compounds detected on second day degradation by m-NBR platform.

| S. No.                        | Name of the Compound          | Type of Hydrocarbon | RT      | Peak Area | Area Percentage                 | Molecular Formula               | Match Score |
|-------------------------------|-------------------------------|---------------------|---------|-----------|---------------------------------|---------------------------------|-------------|
| 1                             | Undecane                      | <b>n-Alkane</b>     | 5.538   | 35341     | 1.34                            | C <sub>11</sub> H <sub>24</sub> | 80.4        |
| 2                             | Dodecane                      |                     | 6.346   | 103474    | 3.93                            | C <sub>12</sub> H <sub>26</sub> | 88.1        |
| 3                             | Tridecane                     |                     | 6.847   | 141192    | 5.37                            | C <sub>13</sub> H <sub>28</sub> | 90.5        |
| 4                             | Tetradecane                   |                     | 7.391   | 123437    | 4.69                            | C <sub>14</sub> H <sub>30</sub> | 90.0        |
| 5                             | Pentadecane                   |                     | 8.081   | 109738    | 4.17                            | C <sub>15</sub> H <sub>32</sub> | 91.7        |
| 6                             | Hexadecane                    |                     | 8.640   | 110551    | 4.20                            | C <sub>16</sub> H <sub>34</sub> | 85.4        |
| 7                             | Heptadecane                   |                     | 9.586   | 89316     | 3.39                            | C <sub>17</sub> H <sub>36</sub> | 87.8        |
| 8                             | Octadecane                    |                     | 10.801  | 87615     | 3.33                            | C <sub>18</sub> H <sub>38</sub> | 84.5        |
| <b>n-Alkane percentage</b>    |                               |                     |         |           |                                 | <b>30.44</b>                    |             |
| 9                             | Hexane, 3,3-dimethyl-         | <b>iso-Alkane</b>   | 5.261   | 35110     | 1.33                            | C <sub>8</sub> H <sub>18</sub>  | 82.1        |
| 10                            | Nonane, 5-(2-methylpropyl)-   |                     | 6.037   | 14734     | 0.56                            | C <sub>13</sub> H <sub>28</sub> | 84.1        |
| 11                            | 4,4-Dipropylheptane           |                     | 6.090   | 10410     | 0.39                            | C <sub>13</sub> H <sub>28</sub> | 84.6        |
| 12                            | Octane, 4-ethyl-              |                     | 6.321   | 18140     | 0.69                            | C <sub>10</sub> H <sub>22</sub> | 81.0        |
| 13                            | Undecane, 3-methyl-           |                     | 6.623   | 9748      | 0.37                            | C <sub>12</sub> H <sub>26</sub> | 96.4        |
| 14                            | Undecane, 6-ethyl-            |                     | 6.670   | 63414     | 2.41                            | C <sub>13</sub> H <sub>28</sub> | 94.8        |
| 15                            | Undecane, 4,7-dimethyl-       |                     | 6.994   | 35801     | 1.36                            | C <sub>13</sub> H <sub>28</sub> | 91.1        |
| 16                            | Dodecane, 3-methyl-           |                     | 7.314   | 28304     | 1.08                            | C <sub>13</sub> H <sub>28</sub> | 83.7        |
| 17                            | Dodecane, 2,6,10-trimethyl-   |                     | 7.821   | 27010     | 1.03                            | C <sub>15</sub> H <sub>32</sub> | 86.3        |
| 18                            | Tetradecane, 3-methyl-        |                     | 7.744   | 19314     | 0.73                            | C <sub>15</sub> H <sub>32</sub> | 84.4        |
| 19                            | Heptadecane, 7-methyl-        |                     | 9.174   | 52564     | 2.00                            | C <sub>18</sub> H <sub>38</sub> | 80.6        |
| 20                            | Hexadecane, 2,6,10-trimethyl- |                     | 9.439   | 65442     | 2.49                            | C <sub>19</sub> H <sub>40</sub> | 85.0        |
| 21                            | Undecane, 2-methyl-           |                     | 10.316  | 34058     | 1.29                            | C <sub>12</sub> H <sub>26</sub> | 94.8        |
| 22                            | Nonane, 3,7-dimethyl-         |                     | 10.9394 | 31214     | 1.19                            | C <sub>11</sub> H <sub>24</sub> | 97.1        |
| 23                            | Undecane, 3,7-dimethyl-       |                     | 12.411  | 61007     | 2.32                            | C <sub>13</sub> H <sub>28</sub> | 96.4        |
| 24                            | Octane, 3,4,5,6-tetramethyl-  | 27.865              | 10010   | 0.38      | C <sub>12</sub> H <sub>26</sub> | 85.6                            |             |
| 25                            | Butane, 2,2-dimethyl-         | 28.168              | 640     | 0.02      | C <sub>6</sub> H <sub>14</sub>  | 80.4                            |             |
| <b>iso-Alkane percentage</b>  |                               |                     |         |           |                                 | <b>19.65</b>                    |             |
| 26                            | Cyclohexane                   | <b>Cycloalkanes</b> | 5.204   | 2060      | 0.08                            | C <sub>6</sub> H <sub>12</sub>  | 82.1        |
| 27                            | Cyclooctane                   |                     | 6.431   | 24842     | 0.94                            | C <sub>8</sub> H <sub>16</sub>  | 83.5        |
| <b>Cycloalkane percentage</b> |                               |                     |         |           |                                 | <b>1.02</b>                     |             |
| 28                            | Benzene, tert-butyl-          |                     | 5.139   | 6571      | 0.25                            | C <sub>10</sub> H <sub>14</sub> | 85.9        |
| 29                            | Benzene, 1,2,3-trimethyl-     |                     | 5.542   | 9405      | 0.36                            | C <sub>9</sub> H <sub>12</sub>  | 80.1        |

|                                          |                                |             |        |       |      |                                 |      |
|------------------------------------------|--------------------------------|-------------|--------|-------|------|---------------------------------|------|
| 30                                       | Benzene, 1,2,3,5-tetramethyl-  |             | 6.072  | 18034 | 0.68 | C <sub>10</sub> H <sub>14</sub> | 93.0 |
| 31                                       | Benzene, pentamethyl-          |             | 6.218  | 16570 | 0.63 | C <sub>11</sub> H <sub>16</sub> | 85.0 |
| 32                                       | p-Cymene                       |             | 7.104  | 19835 | 0.75 | C <sub>10</sub> H <sub>14</sub> | 90.1 |
| 33                                       | Naphthalene, 1-methyl-         |             | 7.740  | 32640 | 1.24 | C <sub>12</sub> H <sub>10</sub> | 92.7 |
| 34                                       | Naphthalene, 2-methyl-         |             | 7.828  | 50253 | 1.91 | C <sub>12</sub> H <sub>10</sub> | 92.8 |
| 35                                       | Naphthalene, 1,2-dimethyl-     |             | 7.894  | 24150 | 0.92 | C <sub>12</sub> H <sub>12</sub> | 95.3 |
| 36                                       | Naphthalene, 1,5-dimethyl-     | <b>PAHs</b> | 7.899  | 21536 | 0.82 | C <sub>12</sub> H <sub>12</sub> | 90.3 |
| 37                                       | Naphthalene, 2,6-dimethyl-     |             | 8.161  | 22432 | 0.85 | C <sub>12</sub> H <sub>12</sub> | 93.4 |
| 38                                       | Naphthalene, 2,3-dimethyl-     |             | 8.336  | 10186 | 0.39 | C <sub>12</sub> H <sub>12</sub> | 90.8 |
| 39                                       | Naphthalene, 1,6,7-trimethyl-  |             | 8.410  | 51420 | 1.95 | C <sub>13</sub> H <sub>14</sub> | 89.9 |
| 40                                       | Naphthalene, 2,3,6-trimethyl-  |             | 8.500  | 16413 | 0.62 | C <sub>13</sub> H <sub>14</sub> | 86.1 |
| 41                                       | Naphthalene, 2-ethyl-          |             | 8.656  | 7320  | 0.28 | C <sub>12</sub> H <sub>12</sub> | 98.5 |
| 42                                       | 1,4,5,8-Tetramethylnaphthalene |             | 8.536  | 44238 | 1.68 | C <sub>14</sub> H <sub>16</sub> | 82.1 |
| 43                                       | Anthracene, 2-methyl-          |             | 19.014 | 5936  | 0.22 | C <sub>15</sub> H <sub>12</sub> | 84.4 |
|                                          | Phenanthrene, 2-methyl-        |             | 20.314 | 4215  | 0.16 | C <sub>15</sub> H <sub>12</sub> | 90.6 |
| 44                                       | Dibenzo[fg,ij]pentaphene       |             | 32.017 | 530   | 0.02 | C <sub>28</sub> H <sub>16</sub> | 85.0 |
| <b>PAHs percentage</b>                   |                                |             |        |       |      | <b>13.75</b>                    |      |
| <b>Aliphatic Hydrocarbons percentage</b> |                                |             |        |       |      | <b>51.12</b>                    |      |
| <b>HCs percentage</b>                    |                                |             |        |       |      | <b>64.87</b>                    |      |

#### Day 4

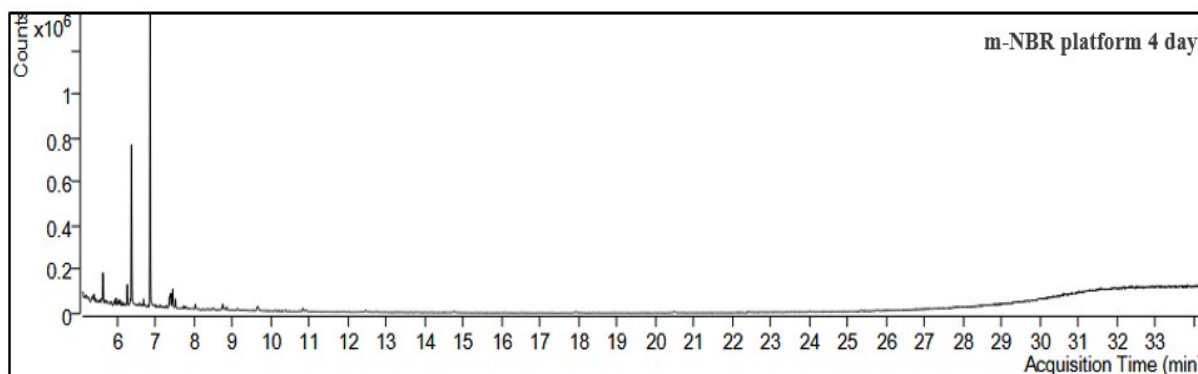

**Table S-8.** GC-MS chromatogram peak list of HCs Compounds detected on fourth day degradation by m-NBR platform.

| S. No. | Name of the Compound | Type of Hydrocarbon | RT    | Peak Area | Area Percentage | Molecular Formula               | Match Score |
|--------|----------------------|---------------------|-------|-----------|-----------------|---------------------------------|-------------|
| 1      | Dodecane             | <b>n-Alkane</b>     | 6.337 | 70173     | 4.81            | C <sub>12</sub> H <sub>26</sub> | 80.0        |
| 2      | Tridecane            |                     | 6.834 | 81490     | 5.58            | C <sub>13</sub> H <sub>28</sub> | 95.3        |
| 3      | Tetradecane          |                     | 7.394 | 63445     | 4.35            | C <sub>14</sub> H <sub>30</sub> | 83.1        |
| 4      | Pentadecane          |                     | 8.015 | 89740     | 6.15            | C <sub>15</sub> H <sub>32</sub> | 95.7        |
| 5      | Hexadecane           |                     | 8.634 | 80550     | 5.52            | C <sub>16</sub> H <sub>34</sub> | 94.1        |
| 6      | Heptadecane          |                     | 9.527 | 89316     | 6.12            | C <sub>17</sub> H <sub>36</sub> | 84.6        |

|                                          |                                |                     |                               |       |                                 |                                 |      |
|------------------------------------------|--------------------------------|---------------------|-------------------------------|-------|---------------------------------|---------------------------------|------|
| 7                                        | Octadecane                     |                     | 10.810                        | 66814 | 4.58                            | C <sub>18</sub> H <sub>38</sub> | 80.4 |
|                                          |                                |                     | <b>n-Alkane percentage</b>    |       | <b>37.10</b>                    |                                 |      |
| 8                                        | Nonane, 5-(2-methylpropyl)-    |                     | 6.140                         | 10621 | 0.73                            | C <sub>13</sub> H <sub>28</sub> | 84.0 |
| 9                                        | 4,4-Dipropylheptane            |                     | 6.024                         | 9102  | 0.62                            | C <sub>13</sub> H <sub>28</sub> | 93.3 |
| 10                                       | Octane, 4-ethyl-               |                     | 6.301                         | 16120 | 1.10                            | C <sub>10</sub> H <sub>22</sub> | 81.0 |
| 11                                       | Undecane, 3-methyl-            |                     | 6.633                         |       | 3.66                            | C <sub>12</sub> H <sub>26</sub> | 93.4 |
| 12                                       | Undecane, 6-ethyl-             | <b>iso-Alkane</b>   | 6.690                         | 53400 | 2.98                            | C <sub>13</sub> H <sub>28</sub> | 81.2 |
| 13                                       | Heptadecane, 7-methyl-         |                     | 9.135                         | 43565 | 3.66                            | C <sub>18</sub> H <sub>38</sub> | 82.3 |
| 14                                       | Hexadecane, 2,6,10-trimethyl-  |                     | 9.614                         | 53440 | 2.19                            | C <sub>19</sub> H <sub>40</sub> | 94.0 |
| 15                                       | Undecane, 2-methyl-            |                     | 10.345                        | 32008 | 2.00                            | C <sub>12</sub> H <sub>26</sub> | 94.5 |
| 16                                       | Nonane, 3,7-dimethyl-          |                     | 10.930                        | 29215 | 4.05                            | C <sub>11</sub> H <sub>24</sub> | 87.5 |
| 17                                       | Undecane, 3,7-dimethyl-        |                     | 12.476                        | 59055 | 0.73                            | C <sub>13</sub> H <sub>28</sub> | 96.1 |
|                                          |                                |                     | <b>iso-Alkane percentage</b>  |       |                                 | <b>21.00</b>                    |      |
| 18                                       | Cyclooctane                    | <b>Cycloalkanes</b> | 6.540                         | 18805 | 1.29                            | C <sub>8</sub> H <sub>16</sub>  | 80.5 |
|                                          |                                |                     | <b>Cycloalkane percentage</b> |       |                                 | <b>1.29</b>                     |      |
| 19                                       | Benzene, 1,2,3,5-tetramethyl-  |                     | 6.035                         | 12085 | 0.83                            | C <sub>10</sub> H <sub>14</sub> | 90.1 |
| 20                                       | Benzene, pentamethyl-          |                     | 6.229                         | 12430 | 0.85                            | C <sub>11</sub> H <sub>16</sub> | 92.3 |
| 21                                       | p-Cymene                       |                     | 7.115                         | 14635 | 1.00                            | C <sub>10</sub> H <sub>14</sub> | 91.1 |
| 22                                       | Naphthalene, 1-methyl-         |                     | 7.765                         | 24860 | 1.70                            | C <sub>12</sub> H <sub>10</sub> | 90.4 |
| 23                                       | Naphthalene, 2-methyl-         |                     | 7.764                         | 36254 | 2.48                            | C <sub>12</sub> H <sub>10</sub> | 89.8 |
| 24                                       | Naphthalene, 1,2-dimethyl-     |                     | 7.863                         | 14100 | 0.97                            | C <sub>12</sub> H <sub>12</sub> | 80.6 |
| 25                                       | Naphthalene, 1,5-dimethyl-     |                     | 7.892                         | 17545 | 1.20                            | C <sub>12</sub> H <sub>12</sub> | 82.3 |
| 26                                       | Naphthalene, 2,6-dimethyl-     | <b>PAHs</b>         | 8.336                         | 19431 | 1.33                            | C <sub>12</sub> H <sub>12</sub> | 83.4 |
| 27                                       | Naphthalene, 2,3-dimethyl-     |                     | 8.469                         | 8100  | 0.55                            | C <sub>12</sub> H <sub>12</sub> | 85.7 |
| 28                                       | Naphthalene, 1,6,7-trimethyl-  |                     | 8.415                         | 15478 | 1.06                            | C <sub>13</sub> H <sub>14</sub> | 90.5 |
| 29                                       | Naphthalene, 2,3,6-trimethyl-  |                     | 8.507                         | 8010  | 0.55                            | C <sub>13</sub> H <sub>14</sub> | 87.1 |
| 30                                       | Naphthalene, 2-ethyl-          |                     | 8.635                         | 4050  | 0.28                            | C <sub>12</sub> H <sub>12</sub> | 84.0 |
| 31                                       | 1,4,5,8-Tetramethylnaphthalene |                     | 8.741                         | 30079 | 2.06                            | C <sub>14</sub> H <sub>16</sub> | 82.6 |
| 32                                       | Anthracene, 2-methyl-          |                     | 19.904                        | 3940  | 0.27                            | C <sub>15</sub> H <sub>12</sub> | 80.7 |
| 33                                       | Phenanthrene, 2-methyl-        | 20.017              | 2250                          | 0.15  | C <sub>15</sub> H <sub>12</sub> | 90.5                            |      |
| <b>PAHs percentage</b>                   |                                |                     |                               |       |                                 | <b>15.29</b>                    |      |
| <b>Aliphatic Hydrocarbons percentage</b> |                                |                     |                               |       |                                 | <b>59.39</b>                    |      |
| <b>HCs percentage</b>                    |                                |                     |                               |       |                                 | <b>74.69</b>                    |      |

## Day 6 or 1-Cycle

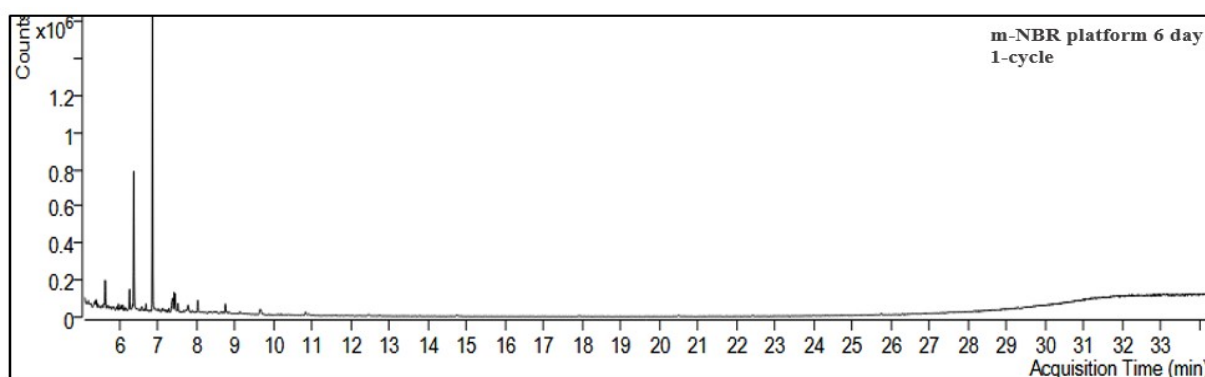

**Table S-9.** GC-MS chromatogram peak list of HCs Compounds detected on sixth day degradation or first catalytic degradation cycle by m-NBR platform.

| S. No.                                   | Name of the Compound           | Type of Hydrocarbon | RT     | Peak Area | Area Percentage                 | Molecular Formula               | Match Score |
|------------------------------------------|--------------------------------|---------------------|--------|-----------|---------------------------------|---------------------------------|-------------|
| 1                                        | Tridecane                      | <b>n-Alkane</b>     | 6.721  | 50490     | 12.27                           | C <sub>13</sub> H <sub>28</sub> | 80.1        |
| 2                                        | Pentadecane                    |                     | 8.037  | 48740     | 11.84                           | C <sub>15</sub> H <sub>32</sub> | 81.5        |
| 3                                        | Hexadecane                     |                     | 8.856  | 36550     | 8.88                            | C <sub>16</sub> H <sub>34</sub> | 85.4        |
| 4                                        | Heptadecane                    |                     | 9.518  | 65316     | 15.87                           | C <sub>17</sub> H <sub>36</sub> | 87.1        |
| <b>n-Alkane percentage</b>               |                                |                     |        |           |                                 | <b>48.86</b>                    |             |
| 5                                        | Undecane, 6-ethyl-             | <b>iso-Alkane</b>   | 6.474  | 21400     | 5.20                            | C <sub>13</sub> H <sub>28</sub> | 94.5        |
| 6                                        | Heptadecane, 7-methyl-         |                     | 9.976  | 18565     | 4.51                            | C <sub>18</sub> H <sub>38</sub> | 84.2        |
| 7                                        | Hexadecane, 2,6,10-trimethyl-  |                     | 9.6134 | 33140     | 8.05                            | C <sub>19</sub> H <sub>40</sub> | 82.0        |
| 8                                        | Undecane, 3,7-dimethyl-        |                     | 12.437 | 41055     | 9.97                            | C <sub>13</sub> H <sub>28</sub> | 98.4        |
| <b>iso-Alkane percentage</b>             |                                |                     |        |           |                                 | <b>27.74</b>                    |             |
| 9                                        | Cyclooctane                    | <b>Cycloalkanes</b> | 6.543  | 7805      | 1.90                            | C <sub>8</sub> H <sub>16</sub>  | 81.5        |
| <b>Cycloalkane percentage</b>            |                                |                     |        |           |                                 | <b>1.90</b>                     |             |
| 10                                       | p-Cymene                       | <b>PAHs</b>         | 7.139  | 8610      | 2.09                            | C <sub>10</sub> H <sub>14</sub> | 80.3        |
| 11                                       | Naphthalene, 1-methyl-         |                     | 7.794  | 16860     | 4.10                            | C <sub>12</sub> H <sub>10</sub> | 92.4        |
| 12                                       | Naphthalene, 2-methyl-         |                     | 7.747  | 21250     | 5.16                            | C <sub>12</sub> H <sub>10</sub> | 94.8        |
| 13                                       | Naphthalene, 1,2-dimethyl-     |                     | 7.847  | 14531     | 3.53                            | C <sub>12</sub> H <sub>12</sub> | 95.7        |
| 14                                       | Naphthalene, 1,5-dimethyl-     |                     | 7.856  | 8434      | 2.05                            | C <sub>12</sub> H <sub>12</sub> | 92.3        |
| 15                                       | Naphthalene, 2,6-dimethyl-     |                     | 8.365  | 15079     | 3.66                            | C <sub>12</sub> H <sub>12</sub> | 90.2        |
| 16                                       | 1,4,5,8-Tetramethylnaphthalene | 8.797               | 8610   | 2.09      | C <sub>14</sub> H <sub>16</sub> | 86.4                            |             |
| <b>PAHs percentage</b>                   |                                |                     |        |           |                                 | <b>20.59</b>                    |             |
| <b>Aliphatic Hydrocarbons percentage</b> |                                |                     |        |           |                                 | <b>78.49</b>                    |             |
| <b>HCs percentage</b>                    |                                |                     |        |           |                                 | <b>99.08</b>                    |             |

**SI-12.** GC-MS quantification of HCs degradation catalytic performance cycles by m-NBR platform.

**2-Cycle**

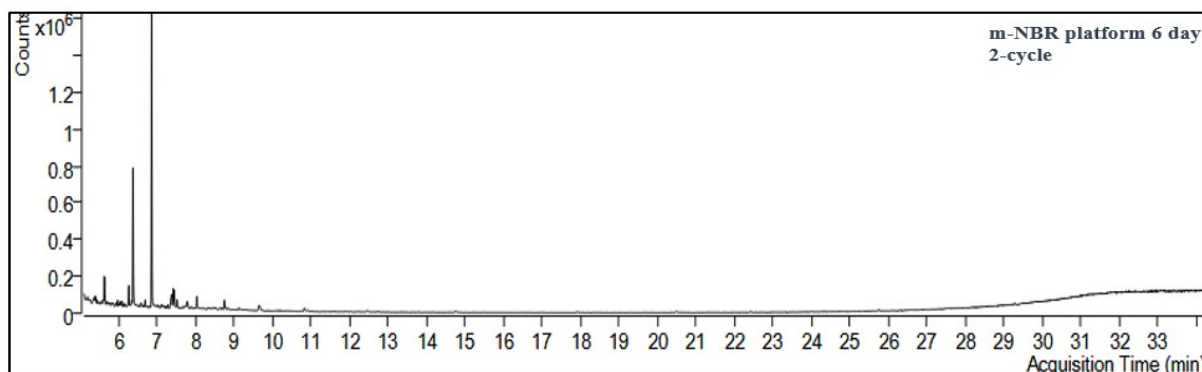

**Table S-10.** GC-MS chromatogram peak list of HCs Compounds detected on second day catalytic degradation cycle by m-NBR platform.

| S. No.                                   | Name of the Compound           | Type of Hydrocarbon | RT     | Peak Area | Area Percentage | Molecular Formula               | Match Score |
|------------------------------------------|--------------------------------|---------------------|--------|-----------|-----------------|---------------------------------|-------------|
| 1                                        | Tridecane                      | <b>n-Alkane</b>     | 6.347  | 49011     | 11.91           | C <sub>13</sub> H <sub>28</sub> | 90.1        |
| 2                                        | Pentadecane                    |                     | 8.674  | 48018     | 11.49           | C <sub>15</sub> H <sub>32</sub> | 81.5        |
| 3                                        | Hexadecane                     |                     | 8.198  | 36012     | 8.62            | C <sub>16</sub> H <sub>34</sub> | 94.0        |
| 4                                        | Heptadecane                    |                     | 9.538  | 64012     | 15.40           | C <sub>17</sub> H <sub>36</sub> | 97.1        |
| <b>n-Alkane percentage</b>               |                                |                     |        |           |                 | <b>48.22</b>                    |             |
| 5                                        | Undecane, 6-ethyl-             | <b>iso-Alkane</b>   | 6.367  | 21085     | 5.12            | C <sub>13</sub> H <sub>28</sub> | 84.5        |
| 6                                        | Heptadecane, 7-methyl-         |                     | 9.196  | 18294     | 4.44            | C <sub>18</sub> H <sub>38</sub> | 80.2        |
| 7                                        | Hexadecane, 2,6,10-trimethyl-  |                     | 9.462  | 32652     | 7.93            | C <sub>19</sub> H <sub>40</sub> | 91.0        |
| 8                                        | Undecane, 3,7-dimethyl-        |                     | 12.357 | 40453     | 9.82            | C <sub>13</sub> H <sub>28</sub> | 98.4        |
| <b>iso-Alkane percentage</b>             |                                |                     |        |           |                 | <b>27.32</b>                    |             |
| 9                                        | Cyclooctane                    | <b>Cycloalkanes</b> | 6.851  | 7689      | 1.87            | C <sub>8</sub> H <sub>16</sub>  | 81.5        |
| <b>Cycloalkane percentage</b>            |                                |                     |        |           |                 | <b>1.87</b>                     |             |
| 10                                       | p-Cymene                       | <b>PAHs</b>         | 7.317  | 8484      | 2.06            | C <sub>10</sub> H <sub>14</sub> | 90.3        |
| 11                                       | Naphthalene, 1-methyl-         |                     | 7.146  | 16615     | 4.04            | C <sub>12</sub> H <sub>10</sub> | 92.5        |
| 12                                       | Naphthalene, 2-methyl-         |                     | 7.394  | 20938     | 5.09            | C <sub>12</sub> H <sub>10</sub> | 90.8        |
| 13                                       | Naphthalene, 1,2-dimethyl-     |                     | 7.267  | 14315     | 3.48            | C <sub>12</sub> H <sub>12</sub> | 95.3        |
| 14                                       | Naphthalene, 1,5-dimethyl-     |                     | 7.168  | 8309      | 2.02            | C <sub>12</sub> H <sub>12</sub> | 82.1        |
| 15                                       | Naphthalene, 2,6-dimethyl-     |                     | 8.943  | 14859     | 3.61            | C <sub>12</sub> H <sub>12</sub> | 90.7        |
| 16                                       | 1,4,5,8-Tetramethylnaphthalene |                     | 8.135  | 8484      | 2.06            | C <sub>14</sub> H <sub>16</sub> | 96.5        |
| <b>PAHs percentage</b>                   |                                |                     |        |           |                 | <b>20.21</b>                    |             |
| <b>Aliphatic Hydrocarbons percentage</b> |                                |                     |        |           |                 | <b>77.41</b>                    |             |
| <b>HCs percentage</b>                    |                                |                     |        |           |                 | <b>97.62</b>                    |             |

### 3-Cycle

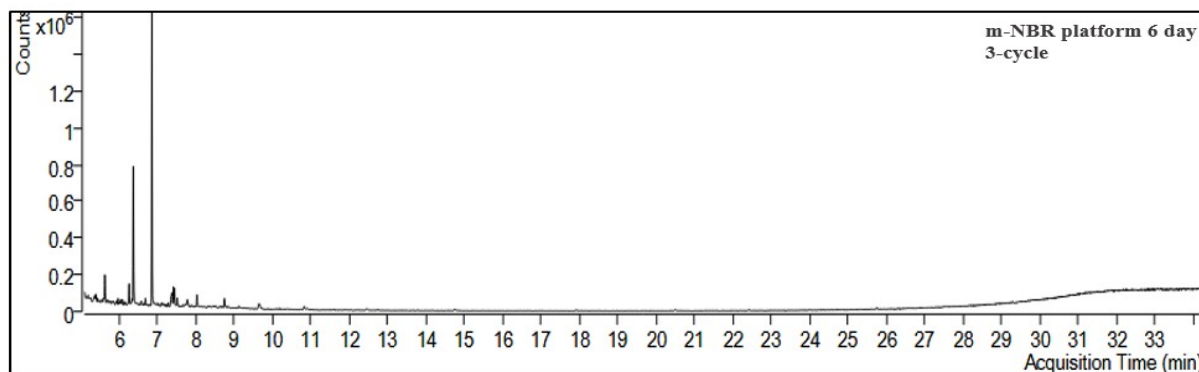

**Table S-11.** GC-MS chromatogram peak list of HCs Compounds detected on third day catalytic degradation cycle by m-NBR platform.

| S. No.                                   | Name of the Compound           | Type of Hydrocarbon | RT     | Peak Area | Area Percentage | Molecular Formula               | Match Score |
|------------------------------------------|--------------------------------|---------------------|--------|-----------|-----------------|---------------------------------|-------------|
| 1                                        | Tridecane                      | n-Alkane            | 6.815  | 48249     | 11.72           | C <sub>13</sub> H <sub>28</sub> | 90.0        |
| 2                                        | Pentadecane                    |                     | 8.041  | 47278     | 11.32           | C <sub>15</sub> H <sub>32</sub> | 91.6        |
| 3                                        | Hexadecane                     |                     | 8.073  | 35455     | 8.48            | C <sub>16</sub> H <sub>34</sub> | 89.4        |
| 4                                        | Heptadecane                    |                     | 9.537  | 63356     | 15.17           | C <sub>17</sub> H <sub>36</sub> | 87.1        |
| <b>n-Alkane percentage</b>               |                                |                     |        |           |                 | <b>47.39</b>                    |             |
| 5                                        | Undecane, 6-ethyl-             | iso-Alkane          | 6.613  | 20757     | 5.04            | C <sub>13</sub> H <sub>28</sub> | 91.3        |
| 6                                        | Heptadecane, 7-methyl-         |                     | 9.134  | 18009     | 4.37            | C <sub>18</sub> H <sub>38</sub> | 80.1        |
| 7                                        | Hexadecane, 2,6,10-trimethyl-  |                     | 9.614  | 32146     | 7.81            | C <sub>19</sub> H <sub>40</sub> | 81.8        |
| 8                                        | Undecane, 3,7-dimethyl-        |                     | 12.436 | 39823     | 9.67            | C <sub>13</sub> H <sub>28</sub> | 96.1        |
| <b>iso-Alkane percentage</b>             |                                |                     |        |           |                 | <b>26.90</b>                    |             |
| 9                                        | Cyclooctane                    | Cycloalkanes        | 6.543  | 7569      | 1.84            | C <sub>8</sub> H <sub>16</sub>  | 94.4        |
| <b>Cycloalkane percentage</b>            |                                |                     |        |           |                 | <b>1.84</b>                     |             |
| 10                                       | p-Cymene                       | PAHs                | 7.107  | 8351      | 2.03            | C <sub>10</sub> H <sub>14</sub> | 80.4        |
| 11                                       | Naphthalene, 1-methyl-         |                     | 7.164  | 16353     | 3.97            | C <sub>12</sub> H <sub>10</sub> | 96.1        |
| 12                                       | Naphthalene, 2-methyl-         |                     | 7.3467 | 20612     | 5.01            | C <sub>12</sub> H <sub>10</sub> | 90.9        |
| 13                                       | Naphthalene, 1,2-dimethyl-     |                     | 7.471  | 14095     | 3.42            | C <sub>12</sub> H <sub>12</sub> | 85.0        |
| 14                                       | Naphthalene, 1,5-dimethyl-     |                     | 7.876  | 8181      | 1.99            | C <sub>12</sub> H <sub>12</sub> | 82.3        |
| 15                                       | Naphthalene, 2,6-dimethyl-     |                     | 8.334  | 14627     | 3.55            | C <sub>12</sub> H <sub>12</sub> | 91.6        |
| 16                                       | 1,4,5,8-Tetramethylnaphthalene |                     | 8.794  | 8351      | 2.03            | C <sub>14</sub> H <sub>16</sub> | 96.1        |
| <b>PAHs percentage</b>                   |                                |                     |        |           |                 | <b>19.98</b>                    |             |
| <b>Aliphatic Hydrocarbons percentage</b> |                                |                     |        |           |                 | <b>76.14</b>                    |             |
| <b>HCs percentage</b>                    |                                |                     |        |           |                 | <b>96.12</b>                    |             |

#### 4-Cycle

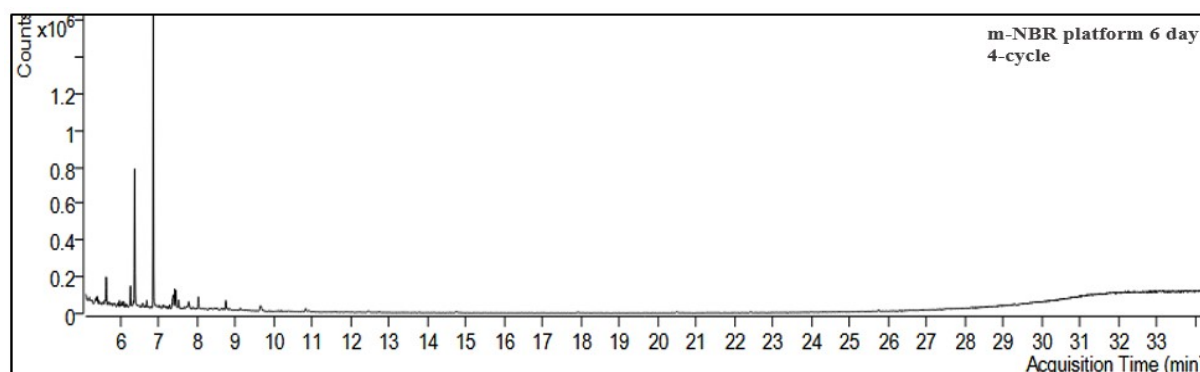

**Table S-12.** GC-MS chromatogram peak list of HCs Compounds detected on fourth day catalytic degradation cycle by m-NBR platform.

| S. No.                                   | Name of the Compound           | Type of Hydrocarbon | RT     | Peak Area | Area Percentage                 | Molecular Formula               | Match Score |
|------------------------------------------|--------------------------------|---------------------|--------|-----------|---------------------------------|---------------------------------|-------------|
| 1                                        | Tridecane                      | <b>n-Alkane</b>     | 6.964  | 47905     | 11.64                           | C <sub>13</sub> H <sub>28</sub> | 80.6        |
| 2                                        | Pentadecane                    |                     | 8.016  | 46937     | 11.23                           | C <sub>15</sub> H <sub>32</sub> | 91.5        |
| 3                                        | Hexadecane                     |                     | 8.248  | 35198     | 8.43                            | C <sub>16</sub> H <sub>34</sub> | 85.1        |
| 4                                        | Heptadecane                    |                     | 9.671  | 62900     | 15.05                           | C <sub>17</sub> H <sub>36</sub> | 97.3        |
| <b>n-Alkane percentage</b>               |                                |                     |        |           |                                 | <b>47.05</b>                    |             |
| 5                                        | Undecane, 6-ethyl-             | <b>iso-Alkane</b>   | 6.034  | 20605     | 5.01                            | C <sub>13</sub> H <sub>28</sub> | 84.5        |
| 6                                        | Heptadecane, 7-methyl-         |                     | 9.147  | 17879     | 4.34                            | C <sub>18</sub> H <sub>38</sub> | 90.2        |
| 7                                        | Hexadecane, 2,6,10-trimethyl-  |                     | 9.946  | 31912     | 7.75                            | C <sub>19</sub> H <sub>40</sub> | 41.8        |
| 8                                        | Undecane, 3,7-dimethyl-        |                     | 12.367 | 39534     | 9.60                            | C <sub>13</sub> H <sub>28</sub> | 88.4        |
| <b>iso-Alkane percentage</b>             |                                |                     |        |           |                                 | <b>26.70</b>                    |             |
| 9                                        | Cyclooctane                    | <b>Cycloalkanes</b> | 6.143  | 7518      | 1.83                            | C <sub>8</sub> H <sub>16</sub>  | 91.1        |
| <b>Cycloalkane percentage</b>            |                                |                     |        |           |                                 | <b>1.83</b>                     |             |
| 10                                       | p-Cymene                       | <b>PAHs</b>         | 7.012  | 8288      | 2.01                            | C <sub>10</sub> H <sub>14</sub> | 80.3        |
| 11                                       | Naphthalene, 1-methyl-         |                     | 7.136  | 16222     | 3.95                            | C <sub>12</sub> H <sub>10</sub> | 82.4        |
| 12                                       | Naphthalene, 2-methyl-         |                     | 7.476  | 20464     | 4.97                            | C <sub>12</sub> H <sub>10</sub> | 90.7        |
| 13                                       | Naphthalene, 1,2-dimethyl-     |                     | 7.671  | 14005     | 3.40                            | C <sub>12</sub> H <sub>12</sub> | 85.3        |
| 14                                       | Naphthalene, 1,5-dimethyl-     |                     | 7.710  | 8121      | 1.97                            | C <sub>12</sub> H <sub>12</sub> | 92.3        |
| 15                                       | Naphthalene, 2,6-dimethyl-     |                     | 8.231  | 14510     | 3.53                            | C <sub>12</sub> H <sub>12</sub> | 81.7        |
| 16                                       | 1,4,5,8-Tetramethylnaphthalene | 8.972               | 8288   | 2.01      | C <sub>14</sub> H <sub>16</sub> | 96.2                            |             |
| <b>PAHs percentage</b>                   |                                |                     |        |           |                                 | <b>19.86</b>                    |             |
| <b>Aliphatic Hydrocarbons percentage</b> |                                |                     |        |           |                                 | <b>75.58</b>                    |             |
| <b>HCs percentage</b>                    |                                |                     |        |           |                                 | <b>95.44</b>                    |             |

## 5-Cycle

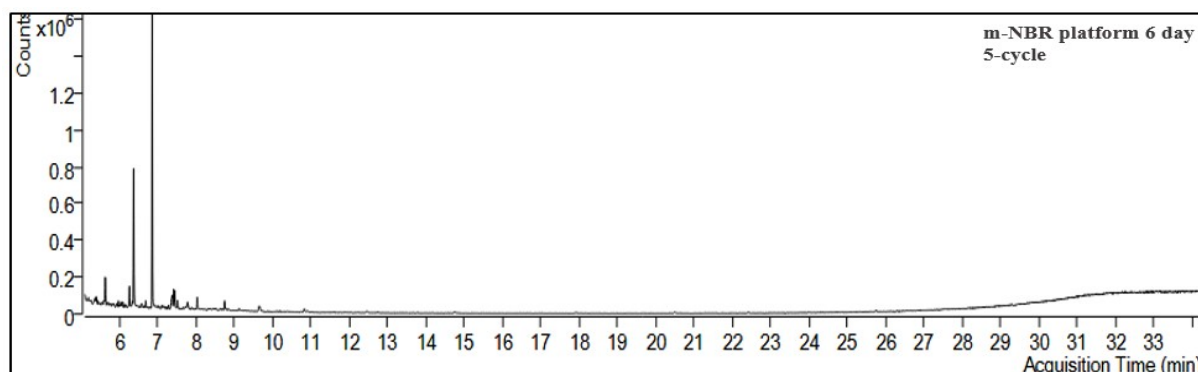

**Table S-13.** GC-MS chromatogram peak list of HCs Compounds detected on fifth day catalytic degradation cycle by m-NBR platform.

| S. No.                                   | Name of the Compound           | Type of Hydrocarbon | RT     | Peak Area | Area Percentage                 | Molecular Formula               | Match Score |
|------------------------------------------|--------------------------------|---------------------|--------|-----------|---------------------------------|---------------------------------|-------------|
| 1                                        | Tridecane                      | n-Alkane            | 6.017  | 47200     | 11.46                           | C <sub>13</sub> H <sub>28</sub> | 90.7        |
| 2                                        | Pentadecane                    |                     | 8.317  | 46240     | 11.07                           | C <sub>15</sub> H <sub>32</sub> | 92.1        |
| 3                                        | Hexadecane                     |                     | 8.396  | 34680     | 8.30                            | C <sub>16</sub> H <sub>34</sub> | 88.3        |
| 4                                        | Heptadecane                    |                     | 9.873  | 61980     | 14.84                           | C <sub>17</sub> H <sub>36</sub> | 83.8        |
| <b>n-Alkane percentage</b>               |                                |                     |        |           |                                 | <b>45.68</b>                    |             |
| 5                                        | Undecane, 6-ethyl-             | iso-Alkane          | 6.767  | 20309     | 4.93                            | C <sub>13</sub> H <sub>28</sub> | 94.5        |
| 6                                        | Heptadecane, 7-methyl-         |                     | 9.697  | 17619     | 4.28                            | C <sub>18</sub> H <sub>38</sub> | 80.1        |
| 7                                        | Hexadecane, 2,6,10-trimethyl-  |                     | 9.776  | 31440     | 7.64                            | C <sub>19</sub> H <sub>40</sub> | 93.0        |
| 8                                        | Undecane, 3,7-dimethyl-        |                     | 12.143 | 38960     | 9.47                            | C <sub>13</sub> H <sub>28</sub> | 98.4        |
| <b>iso-Alkane percentage</b>             |                                |                     |        |           |                                 | <b>26.33</b>                    |             |
| 9                                        | Cyclooctane                    | Cycloalkanes        | 6.517  | 7400      | 1.80                            | C <sub>8</sub> H <sub>16</sub>  | 81.5        |
| <b>Cycloalkane percentage</b>            |                                |                     |        |           |                                 | <b>1.80</b>                     |             |
| 10                                       | p-Cymene                       | PAHs                | 7.113  | 8170      | 1.98                            | C <sub>10</sub> H <sub>14</sub> | 80.1        |
| 11                                       | Naphthalene, 1-methyl-         |                     | 7.716  | 15990     | 3.89                            | C <sub>12</sub> H <sub>10</sub> | 92.4        |
| 12                                       | Naphthalene, 2-methyl-         |                     | 7.177  | 20150     | 4.90                            | C <sub>12</sub> H <sub>10</sub> | 90.6        |
| 13                                       | Naphthalene, 1,2-dimethyl-     |                     | 7.964  | 13790     | 3.34                            | C <sub>12</sub> H <sub>12</sub> | 85.3        |
| 14                                       | Naphthalene, 1,5-dimethyl-     |                     | 7.183  | 7990      | 1.93                            | C <sub>12</sub> H <sub>12</sub> | 92.3        |
| 15                                       | Naphthalene, 2,6-dimethyl-     |                     | 8.173  | 14290     | 3.46                            | C <sub>12</sub> H <sub>12</sub> | 83.7        |
| 16                                       | 1,4,5,8-Tetramethylnaphthalene | 8.169               | 8170   | 1.98      | C <sub>14</sub> H <sub>16</sub> | 86.4                            |             |
| <b>PAHs percentage</b>                   |                                |                     |        |           |                                 | <b>20.24</b>                    |             |
| <b>Aliphatic Hydrocarbons percentage</b> |                                |                     |        |           |                                 | <b>73.81</b>                    |             |
| <b>HCs percentage</b>                    |                                |                     |        |           |                                 | <b>94.05</b>                    |             |

---

**SI-13.** Density functional theory quantum chemical calculations for oxides of silver species ( $\text{AgO}^-$ ,  $\text{Ag}_2\text{O}$  and  $\text{Ag}_4\text{O}^{2+}$ ).

---

**a.** The Cartesian coordinates of optimized geometries of the designed dyes  $\text{AgO}^-$  Symbolic Z-matrix:

-----  
# opt b3pw91/lanl2dz geom = connectivity  
-----

-----  
 $\text{AgO}^-$   
-----

Symbolic Z-matrix:

Charge = 1 Multiplicity = 1

|    |          |         |          |
|----|----------|---------|----------|
| Ag | -3.58761 | 1.30471 | -1.79217 |
| O  | -2.52278 | 1.18497 | -0.39596 |

**b.** The Cartesian coordinates of optimized geometries of the designed dyes  $\text{Ag}_2\text{O}$ , Symbolic Z-matrix:

-----  
# opt b3pw91/lanl2dz geom = connectivity  
-----

-----  
 $\text{Ag}_2\text{O}$   
-----

Charge = 0 Multiplicity = 1

Cartesian coordinates:

|    |          |          |          |
|----|----------|----------|----------|
| Ag | -0.76751 | -0.01347 | -0.22536 |
| Ag | -1.37564 | 2.93799  | -0.38199 |
| O  | -2.35915 | 1.19566  | -0.30096 |

**c.** The Cartesian coordinates of optimized geometries of the designed dyes  $\text{Ag}_4\text{O}^{2+}$  Symbolic Z-matrix:

-----  
# opt b3pw91/lanl2dz geom = connectivity  
-----

-----  
 $\text{Ag}_4\text{O}^{2+}$   
-----

Symbolic Z-matrix:

Charge = 2 Multiplicity = 1

|    |          |          |          |
|----|----------|----------|----------|
| Ag | -0.99619 | -0.14238 | -0.68243 |
| Ag | -1.64336 | 2.96726  | 0.07783  |
| Ag | -3.66022 | 1.31287  | -1.88737 |

|    |          |         |          |
|----|----------|---------|----------|
| Ag | -3.50095 | 0.56948 | 1.2889   |
| O  | -2.45018 | 1.17681 | -0.30077 |

**d.** The Cartesian coordinates of optimized geometries of the designed dyes H<sub>2</sub>O Symbolic Z-matrix:

-----  
# opt b3pw91/lanl2dz geom = connectivity  
-----

-----  
H<sub>2</sub>O  
-----

Symbolic Z-matrix:

Charge = 0 Multiplicity = 1

|   |          |          |          |
|---|----------|----------|----------|
| O | -2.11572 | -0.42636 | -2.53263 |
| H | -1.15572 | -0.42636 | -2.53263 |
| H | -2.43618 | 0.47857  | -2.53263 |

**e.** The Cartesian coordinates of optimized geometries of the designed dyes HO• Symbolic Z-matrix:

-----  
# opt b3pw91/lanl2dz geom = connectivity  
-----

-----  
HO•  
-----

Symbolic Z-matrix:

Charge = 0 Multiplicity = 2

|   |          |          |          |
|---|----------|----------|----------|
| O | -2.11572 | -0.42636 | -2.53263 |
| H | -1.79527 | -0.39478 | -1.62824 |

**f.** The Cartesian coordinates of optimized geometries of the designed dyes O<sub>2</sub> Symbolic Z-matrix:

-----  
# opt b3pw91/lanl2dz geom = connectivity  
-----

-----  
O<sub>2</sub>  
-----

Symbolic Z-matrix:

Charge = 0 Multiplicity = 1

|   |          |          |          |
|---|----------|----------|----------|
| O | -2.11572 | -0.42636 | -2.53263 |
| O | -3.27732 | -0.42636 | -2.53263 |

g. The Cartesian coordinates of optimized geometries of the designed dyes O<sub>2</sub><sup>•-</sup> Symbolic Z-matrix:

-----

O<sub>2</sub><sup>•-</sup>

-----

Symbolic Z-matrix:

Charge = -1 Multiplicity = 2

O            -2.11572 -0.42636 -2.53263

O            -3.27732 -0.42636 -2.53263

---

**SI-14.** List of Electronic Energies of HCs including n-alkanes, iso-alkanes, cycloalkanes, poly aromatic hydrocarbons and secondary metabolites from GC-MS studies

---

**Table S-14** List of electronic energies of HCs from petroleum oil pollutants of all n-alkanes, iso-alkanes, cycloalkanes and PAHs are calculated at the B3PW91/LANL2DZ level of theory and basis sets.

| Hydrocarbon classifications | Name of the compound         | Multiplicity   | E (Hartree)    | ZPE (Hartree) | Thermal correction to energy (Hartree) | Thermal correction to Gibbs free energy (Hartree) | Solvation (Water) kcal/mol | Total energy including solvent, ZPE and thermal corrections (Hartree) |
|-----------------------------|------------------------------|----------------|----------------|---------------|----------------------------------------|---------------------------------------------------|----------------------------|-----------------------------------------------------------------------|
| n-Alkanes                   | undecane                     | singlet        | -433.439317053 | 0.334619      | 0.349816                               | 0.290951                                          | -0.10                      | -432.4639311                                                          |
|                             | dodecane                     | singlet        | -472.733373916 | 0.363332      | 0.379894                               | 0.317476                                          | -0.11                      | -471.6726719                                                          |
|                             | tridecane                    | singlet        | -512.027433178 | 0.392086      | 0.409998                               | 0.344134                                          | -0.12                      | -510.8812152                                                          |
|                             | tetradecane                  | singlet        | -551.321489126 | 0.420799      | 0.440078                               | 0.370682                                          | -0.13                      | -550.0899301                                                          |
|                             | pentadecane                  | singlet        | -590.615547418 | 0.449546      | 0.470178                               | 0.397348                                          | -0.14                      | -589.2984754                                                          |
|                             | hexadecane                   | singlet        | -629.909603125 | 0.478261      | 0.500260                               | 0.423911                                          | -0.15                      | -628.5071711                                                          |
|                             | heptadecane                  | singlet        | -669.203660951 | 0.507004      | 0.530357                               | 0.450581                                          | -0.15                      | -667.715719                                                           |
|                             | octadecane                   | singlet        | -708.497716649 | 0.535720      | 0.560441                               | 0.477156                                          | -0.16                      | -706.9243996                                                          |
| Iso-Alkanes                 | butane, 2,2-dimethyl-        | singlet        | -236.967870777 | 0.189924      | 0.198156                               | 0.158643                                          | -0.06                      | -236.4211478                                                          |
|                             | hexane, 3,3-dimethyl-        | singlet        | -315.552649751 | 0.247170      | 0.258274                               | 0.211035                                          | -0.07                      | -314.8361708                                                          |
|                             | octane, 4-ethyl-             | singlet        | -394.138955287 | 0.305564      | 0.319318                               | 0.264526                                          | -0.09                      | -393.2495473                                                          |
|                             | octane, 3,4,5,6-tetramethyl- | singlet        | -472.714969834 | 0.362883      | 0.378803                               | 0.320972                                          | -0.10                      | -471.6523118                                                          |
|                             | heptane, 4,4-dipropyl-       | singlet        | -512.012759444 | 0.391948      | 0.409493                               | 0.347230                                          | -0.11                      | -510.8640884                                                          |
|                             | nonane, 3,7-dimethyl-        | singlet        | -433.435331518 | 0.333833      | 0.349013                               | 0.290692                                          | -0.09                      | -432.4617935                                                          |
|                             | nonane, 5-(2-methylpropyl)-  | singlet        | -512.020881393 | 0.391594      | 0.409227                               | 0.345527                                          | -0.11                      | -510.8745334                                                          |
|                             | undecane, 2-methyl-          | singlet        | -472.732844854 | 0.362786      | 0.379338                               | 0.316865                                          | -0.10                      | -471.6738559                                                          |
|                             | undecane, 3-methyl-          | singlet        | -472.731368865 | 0.362802      | 0.379405                               | 0.316815                                          | -0.10                      | -471.6723469                                                          |
|                             | undecane, 6-ethyl-           | singlet        | -512.021043646 | 0.391857      | 0.409712                               | 0.343587                                          | -0.11                      | -510.8758876                                                          |
|                             | undecane, 3,7-dimethyl-      | singlet        | -512.023308558 | 0.390842      | 0.408938                               | 0.342270                                          | -0.11                      | -510.8812586                                                          |
|                             | undecane, 4,7-dimethyl-      | singlet        | -512.023074336 | 0.390994      | 0.409020                               | 0.343310                                          | -0.11                      | -510.8797503                                                          |
|                             | dodecane, 3-methyl-          | singlet        | -511.248269533 | 0.383678      | 0.402683                               | 0.335724                                          | -0.11                      | -510.1261845                                                          |
|                             | dodecane, 2,6,10-trimethyl-  | singlet        | -590.610841306 | 0.447782      | 0.468599                               | 0.395287                                          | -0.12                      | -589.2991733                                                          |
| tetradecane, 3-             | singlet                      | -589.854305027 | 0.440838       | 0.462507      | 0.388706                               | -0.13                                             | -588.562254                |                                                                       |

|                                                             |                                         |                |                |          |          |           |              |              |
|-------------------------------------------------------------|-----------------------------------------|----------------|----------------|----------|----------|-----------|--------------|--------------|
|                                                             | methyl-hexadecane,                      | singlet        | -747.785533658 | 0.562676 | 0.588996 | 0.501444  | -0.15        | -746.1324177 |
|                                                             | 2,6,10-trimethyl-heptadecane, 7-methyl- | singlet        | -708.495592106 | 0.534959 | 0.559826 | 0.475938  | -0.15        | -706.9248691 |
| Cycloalkanes                                                | cyclohexane                             | singlet        | -235.764915140 | 0.171949 | 0.177688 | 0.143096  | -0.05        | -235.2721821 |
|                                                             | cyclooctane                             | singlet        | -314.321273328 | 0.229869 | 0.237633 | 0.197492  | -0.06        | -313.6562793 |
| Poly Aromatic Hydrocarbons                                  | benzene, tert-butyl-                    | singlet        | -389.305229744 | 0.215123 | 0.224936 | 0.180495  | -0.14        | -388.6846757 |
|                                                             | p-cymene                                | singlet        | -389.312427097 | 0.214574 | 0.225114 | 0.177267  | -0.11        | -388.6954721 |
|                                                             | benzene, 1,2,3-trimethyl-               | singlet        | -350.020274289 | 0.185710 | 0.194890 | 0.151747  | -0.14        | -349.4879273 |
|                                                             | Benzene, 1,2,3,5-tetramethyl-           | singlet        | -389.318899917 | 0.213278 | 0.223498 | 0.177995  | -0.15        | -388.7041289 |
|                                                             | Benzene, pentamethyl-                   | singlet        | -420.601642679 | 0.116289 | 0.123365 | 0.084307  | -0.17        | -420.2776817 |
|                                                             | naphthalene, 1-methyl-                  | singlet        | -424.988295507 | 0.177736 | 0.186007 | 0.144794  | -0.17        | -424.4797585 |
|                                                             | naphthalene, 2-methyl-                  | singlet        | -424.988741552 | 0.177117 | 0.184842 | 0.144593  | -0.17        | -424.4821896 |
|                                                             | naphthalene, 2-ethyl-                   | singlet        | -464.281134570 | 0.206400 | 0.215199 | 0.172604  | -0.17        | -463.6869316 |
|                                                             | naphthalene, 1,2-dimethyl-              | singlet        | -464.284064506 | 0.205851 | 0.215750 | 0.170999  | -0.18        | -463.6914645 |
|                                                             | naphthalene, 2,3-dimethyl-              | singlet        | -464.287657439 | 0.205480 | 0.215445 | 0.170495  | -0.18        | -463.6962374 |
|                                                             | naphthalene, 1,5-dimethyl-              | singlet        | -464.285937276 | 0.205821 | 0.215690 | 0.171090  | -0.17        | -463.6933363 |
|                                                             | naphthalene, 2,6-dimethyl-              | singlet        | -464.288741834 | 0.205051 | 0.215335 | 0.169166  | -0.18        | -463.6991898 |
|                                                             | naphthalene, 1,6,7-trimethyl-           | singlet        | -503.585561560 | 0.233549 | 0.245122 | 0.196782  | -0.19        | -502.9101086 |
|                                                             | naphthalene, 2,3,6-trimethyl-           | singlet        | -503.586712444 | 0.233151 | 0.244928 | 0.195828  | -0.18        | -502.9128054 |
|                                                             | naphthalene, 1,4,5,8-tetramethyl-       | singlet        | -542.855025338 | 0.262533 | 0.273813 | 0.226144  | -0.20        | -542.0925353 |
|                                                             | anthracene, 2-methyl-                   | singlet        | -578.546370098 | 0.224704 | 0.235748 | 0.187839  | -0.21        | -577.8980791 |
|                                                             | phenanthrene, 2-methyl-                 | singlet        | -578.554725533 | 0.225039 | 0.236137 | 0.187891  | -0.22        | -577.9056585 |
| dibenzo[fg,ij]pentaphene                                    | singlet                                 | -1076.12960032 | 0.354280       | 0.372224 | 0.307770 | -0.31     | -1075.095326 |              |
| Poly Aromatic Hydrocarbon biodegraded secondary metabolites | benzoic acid                            | singlet        | -420.601642679 | 0.116289 | 0.123365 | 0.084307  | -0.30        | -420.2776817 |
|                                                             | 2,5-dihydroxy benzoic acid              | singlet        | -570.943259054 | 0.122988 | 0.131611 | 0.089454  | -0.69        | -570.5992061 |
| secondary metabolites                                       | 1,3-benzene diol                        | singlet        | -382.493441237 | 0.109075 | 0.115788 | 0.078540  | -0.38        | -382.1900382 |
|                                                             | m-toluic acid                           | singlet        | -459.900927098 | 0.143897 | 0.151981 | 0.110528  | -0.30        | -459.4945211 |
| Aliphatic hydrocarbon biodegraded secondary metabolites     | malonic acid                            | singlet        | -417.423438815 | 0.076605 | 0.083620 | 0.044035  | -0.49        | -417.2191788 |
|                                                             | oxalic acid                             | singlet        | -378.107271164 | 0.047489 | 0.052253 | 0.019153  | -0.52        | -377.9883762 |
|                                                             | adipic acid                             | singlet        | -535.314425103 | 0.162997 | 0.174098 | 0.122672  | -0.51        | -534.8546581 |
|                                                             | acetic acid                             | singlet        | -228.965175235 | 0.061663 | 0.066297 | 0.034161  | -0.28        | -228.8030542 |
|                                                             | acetaldehyde                            | singlet        | -153.748810415 | 0.056020 | 0.059907 | 0.031043  | -0.21        | -153.6018404 |
|                                                             | but-2-enoic acid                        | singlet        | -306.323683904 | 0.095683 | 0.102232 | 0.065405  | -0.30        | -306.0603639 |
| 2,3-butenediol                                              | singlet                                 | -308.738822641 | 0.141352       | 0.149293 | 0.110078 | -0.31     | -308.3380996 |              |
| Complete mineralization                                     | Carbon dioxide                          | singlet        | -188.464111154 | 0.011024 | 0.013694 | -0.009738 | -0.11        | -188.4491312 |

---\*\*\*---
